# Supplementary material for: Risk of dementia in gout and hyperuricaemia: a meta-analysis of cohort studies
Source: PubMed Central journal article supplement — BMJ Open. 2021 Jun 22;11(6):e041680. doi: 10.1136/bmjopen-2020-041680 (PMC8220455; doi:10.1136/bmjopen-2020-041680), 2021-06-22
Supplement: bmjopen-2020-041680.draft_revisions.pdf [file bmjopen-2020-041680.draft_revisions.pdf]

# BMJ Open

BMJ Open is committed to open peer review. As part of this commitment we make the peer review history of every article we publish publicly available.

When an article is published we post the peer reviewers' comments and the authors' responses online. We also post the versions of the paper that were used during peer review. These are the versions that the peer review comments apply to.

The versions of the paper that follow are the versions that were submitted during the peer review process. They are not the versions of record or the final published versions. They should not be cited or distributed as the published version of this manuscript.

BMJ Open is an open access journal and the full, final, typeset and author-corrected version of record of the manuscript is available on our site with no access controls, subscription charges or pay-per-view fees (<http://bmjopen.bmj.com>).

If you have any questions on BMJ Open's open peer review process please email [info.bmjopen@bmj.com](mailto:info.bmjopen@bmj.com)

# BMJ Open

## The risk of dementia in gout and hyperuricemia: a meta-analysis of cohort studies

|                               |                                                                                                                                                                                                                                                                                                                                                                                                                                                                 |
|-------------------------------|-----------------------------------------------------------------------------------------------------------------------------------------------------------------------------------------------------------------------------------------------------------------------------------------------------------------------------------------------------------------------------------------------------------------------------------------------------------------|
| Journal:                      | <i>BMJ Open</i>                                                                                                                                                                                                                                                                                                                                                                                                                                                 |
| Manuscript ID                 | bmjopen-2020-041680                                                                                                                                                                                                                                                                                                                                                                                                                                             |
| Article Type:                 | Original research                                                                                                                                                                                                                                                                                                                                                                                                                                               |
| Date Submitted by the Author: | 15-Jun-2020                                                                                                                                                                                                                                                                                                                                                                                                                                                     |
| Complete List of Authors:     | pan, shu-yue; Sichuan University West China Hospital, Cheng, Rui-Juan; Sichuan University West China Hospital, Department of Rheumatology and Immunology<br>Xia, Zi-jing; Sichuan University West China Hospital, Department of Rheumatology and Immunology<br>Zhang, Qiu-Ping; Sichuan University West China Hospital, Department of Rheumatology and Immunology<br>Liu, Yi; Sichuan University West China Hospital, Department of Rheumatology and Immunology |
| Keywords:                     | INTERNAL MEDICINE, Dementia < NEUROLOGY, Stroke < NEUROLOGY, Neurology < INTERNAL MEDICINE, Rheumatology < INTERNAL MEDICINE                                                                                                                                                                                                                                                                                                                                    |
|                               |                                                                                                                                                                                                                                                                                                                                                                                                                                                                 |

SCHOLARONE™  
Manuscripts

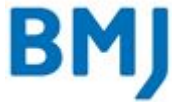

I, the Submitting Author has the right to grant and does grant on behalf of all authors of the Work (as defined in the below author licence), an exclusive licence and/or a non-exclusive licence for contributions from authors who are: i) UK Crown employees; ii) where BMJ has agreed a CC-BY licence shall apply, and/or iii) in accordance with the terms applicable for US Federal Government officers or employees acting as part of their official duties; on a worldwide, perpetual, irrevocable, royalty-free basis to BMJ Publishing Group Ltd ("BMJ") its licensees and where the relevant Journal is co-owned by BMJ to the co-owners of the Journal, to publish the Work in this journal and any other BMJ products and to exploit all rights, as set out in our [licence](#).

The Submitting Author accepts and understands that any supply made under these terms is made by BMJ to the Submitting Author unless you are acting as an employee on behalf of your employer or a postgraduate student of an affiliated institution which is paying any applicable article publishing charge ("APC") for Open Access articles. Where the Submitting Author wishes to make the Work available on an Open Access basis (and intends to pay the relevant APC), the terms of reuse of such Open Access shall be governed by a Creative Commons licence – details of these licences and which [Creative Commons](#) licence will apply to this Work are set out in our licence referred to above.

Other than as permitted in any relevant BMJ Author's Self Archiving Policies, I confirm this Work has not been accepted for publication elsewhere, is not being considered for publication elsewhere and does not duplicate material already published. I confirm all authors consent to publication of this Work and authorise the granting of this licence.

## The risk of dementia in gout and hyperuricemia: a meta-analysis of cohort studies

Shu-Yue Pan<sup>12+</sup>, Rui-Juan Cheng<sup>1+</sup>, Zi-Jing Xia<sup>1</sup>, Qiu-Ping Zhang<sup>1</sup>, Yi Liu<sup>1\*</sup>

1 Department of Rheumatology and Immunology, West China Hospital, Sichuan University, Chengdu, Sichuan, China.

2 Department of Rheumatology and Immunology, Chengdu Fifth People's Hospital, Chengdu, Sichuan, China.

\*Corresponding author: Yi Liu E-mail address: [yi2006liu@163.com](mailto:yi2006liu@163.com)

+Shu-Yue Pan and Rui-Juan Cheng are co-first authors.

### Abstract

**Objectives:** Gout is a systemic disease based on abnormal uric acid metabolism. Recent studies have found that elevated uric acid levels are related to the occurrence of dementia. We conducted the study to investigate the association between dementia and gout or hyperuricemia.

**Design:** Systematic review and meta-analysis of cohort studies.

**Data sources:** Studies were screened from inception to June 28, 2019 by searching Medline, EMBASE, and the Cochrane library databases.

**Eligibility criteria:** Cohort studies comparing the risk of dementia in patients with gout and hyperuricemia versus non-gout and non-hyperuricemia controls were enrolled.

**Data extraction and analysis:** Two reviewers separately selected studies and extracted data using the Medical Subject Headings without restriction in languages or countries. The adjusted HRs was pooled using the DerSimonian and Laird random-effects model. Sensitivity analyses were conducted to evaluate the stability of results. Publication bias was evaluated

1  
2  
3  
4 with Egger's and Begg's tests. Quality assessment was estimated according to the  
5  
6 Newcastle-Ottawa scale.  
7

8  
9 **Results:** A total of four cohort studies met the inclusion criteria were abstracted in our  
10  
11 meta-analysis. We found gout and hyperuricemia do not increase the risk of dementia, with  
12  
13 the pooled hazard ratio of 0.94 (95% CI, 0.69–1.28). While gout and hyperuricemia might  
14  
15 decrease the risk of Alzheimer's disease (AD), with the pooled hazard ratio of 0.78 (95% CI,  
16  
17 0.64–0.95). Little evidence of publication bias was observed. Quality assessment of included  
18  
19 studies was high (range from 6 to 8 stars).  
20  
21  
22

23  
24 **Conclusions:** Our study shows that gout and hyperuricemia do not increase the risk of  
25  
26 dementia. However, gout and hyperuricemia have a protective effect on AD. Due to the  
27  
28 limited number of research articles, more investigations are needed to demonstrate the  
29  
30 potential relationship between dementia and gout or hyperuricemia.  
31  
32  
33

34  
35  
36  
37 **Keywords:** gout, hyperuricemia, dementia, Alzheimer's disease; meta-analysis;  
38  
39  
40  
41  
42

#### 43 **Strengths and limitations of this study :**

- 44  
45 ● We conducted a meta-analysis of cohort studies to compare the risk of dementia in  
46  
47 patients with gout and hyperuricemia.
- 48  
49 ● Our study provides a simple indicator of prognosis management for patients with  
50  
51 dementia as a clinical guide.
- 52  
53 ● Countries, environmental factors, ethodological factors in design, and clinical features  
54  
55 were the main sources of heterogeneity in our study.  
56  
57  
58  
59  
60

## INTRODUCTION

With the aging of the population and the improvement of living standards, the incidence of ageing-related cerebrovascular diseases and metabolic diseases is increasing. Dementia is a mental disorder syndrome caused by various cerebrovascular diseases, which seriously endangers the health of the elderly. Notably, the number of people with dementia worldwide is expected to soar up to 115 million by 2050<sup>1</sup>. Therefore, it is essential to study the pathogenesis of dementia so as to better prevent and treat dementia.

Recent studies reported that patients with autoimmune diseases such as rheumatoid arthritis and systemic lupus erythematosus might be at an increased risk of developing dementia<sup>2,3</sup>. The association between chronic inflammation and dementia has been identified in several epidemiologic studies. Gout, the most common inflammatory arthritis in adults, is characterized by hyperuricemia and monosodiumurate crystal formation which cause chronic inflammation. Uric acid is a natural water-soluble antioxidant in the human body, which also has an oxidative effect. In recent years, blood uric acid levels have been considered closely related to cognitive function such as Parkinson's disease and Alzheimer's disease<sup>4</sup>. Many studies have evaluated the relationship between uric acid and cognitive impairment<sup>5-9</sup>. Research conducted by Luet al.<sup>10</sup> supported the potential neuroprotective function of uric acid. In contrast, Schretlen et al.<sup>11</sup> found that elevated blood uric acid increased the risk of cognitive impairment. Whether uric acid is good or bad for dementia lacks strong evidences. Our study aimed to review and summarize literature about cohort studies on the association between dementia and gout or hyperuricemia.

## METHODS

A comprehensive literature search was conducted to identify all relevant articles from the inception of each database until June 28, 2019. We searched three databases, including Medline (Ovid), Embase (Ovid) and Cochrane Library. Two independent reviewers searched databases systemically and extensively to obtain the studies about the association between dementia and gout or hyperuricemia without any language or country restrictions. The Medical Subject Heading (MeSH) terms for “gout”, “hyperuricemia” and “dementia” were used in the search strategy.

Data abstraction was performed by two independent reviewers who using a unified form. From each primary study we extracted the following information about the studies: first author’s last name, year of publication, country where the study was performed, sample size, mean age, proportion of men, diagnostic basis, subtype of dementia, average duration of follow years, adjusted covariates, quality of assessment and adjusted hazard ratio (HR) and 95% confidence interval (CI).

A quality score was calculated to assess the quality of the studies according to the Newcastle-Ottawa scale. Three major components were collected: selection (0–4 points), Comparability (0–2 points) and Outcome (0–3 points). A higher score (at least  $\geq 5$  points) represents better quality.

### Inclusion and exclusion criteria

All the articles were carefully read and evaluated by two investigators, and they assessed

1  
2  
3  
4 literature eligibility independently; Articles were included in the systematic review if they  
5  
6 fulfill the following criteria:(1)the study was a cohort study; (2) the authors reported data  
7  
8 from an original, peer-reviewed study; (3)the authors reported the risk estimates of dementia  
9  
10 morbidity in gout or hyperuricemia patients compared with non-gout or non-hyperuricemia  
11  
12 controls; (4) adjusted hazard ratio (HR) with each study can be extracted or calculated; and (5)  
13  
14 clearly stated dementia, gout and hyperuricemia diagnostic criteria. We used broad inclusion  
15  
16 criteria for studies, including all types of dementia (including vascular dementia, AD et al).  
17  
18

19  
20 Articles were considered for exclusion in the systematic review if:(1) conference articles,  
21  
22 review articles, editorials, commentaries, hypothesis papers, letters;(2)multiple publications  
23  
24 from the same population; (3) did not set a control group; and (4) reported associations with  
25  
26 dementia occurring before onset of gout or hyperuricemia.  
27  
28  
29  
30  
31  
32  
33  
34

### 35 **Statistical analysis**

36  
37 Review Manager 5.3 software was used to calculate the pooled estimate effect. The adjusted  
38  
39 HRs was pooled using the DerSimonian and Laird random-effects model, and the weights  
40  
41 were equal to the inverse variance of each study's effect estimation. Forest plots were  
42  
43 produced to visually assess the HRs and corresponding 95%CI across studies. Heterogeneity  
44  
45 of HRs across studies was evaluated by the Cochrane Q statistic and the I<sup>2</sup> statistic (values of  
46  
47 25%, 50% and 75% were considered to represent low, medium and high heterogeneity  
48  
49 respectively)<sup>12 13</sup>. Sensitivity analysis was conducted to evaluate the stability of results.  
50  
51  
52  
53  
54  
55  
56 Publication bias was evaluated with Egger's and Begg's tests.  
57  
58  
59  
60



## RESULTS

Details of the selection process are presented in a flow diagram (Figure 1). 740 potentially relevant articles were identified from the electronic databases. After one initial screening based on titles and abstracts with the aforementioned criteria, 665 articles were excluded. Full-text evaluation was conducted in the remaining 75 articles, and 71 articles were excluded for not analyze the association of interest or irrelevant or case-control studies or review or meta-analysis or not fulfilling our inclusion criteria. Eventually, four cohort studies were ultimately selected for meta-analysis<sup>7-9 14</sup>.

The details of the characteristics of included studies in meta-analysis were demonstrated in Table 1. All the four studies included both men and women, and the average age of participants is  $\geq 60$  years old. These studies were conducted primarily in US, USA, Taiwan, China and France. The study samples ranged from 406 to 1712821, and the follow-up durations ranged from 2.3 to 12 years. The quality of studies was good, ranging from 6 to 8 stars.

We use Egger's ( $P=0.41$ ) and Begg's ( $P=1.00$ ) tests to further test the publication bias, and there was no statistical evidence of a publication bias among studies. In sensitivity analysis, we evaluate it by changing the analysis model from random-effects model to fix-effects model. We found that the results were unstable for different analysis models giving different results. When use random-effects model, we found that gout or hyperuricemia does not increase the risk of dementia, with the pooled hazard ratio of 0.94 (95% CI, 0.69–1.28). When use fix-effects model, we found that gout or hyperuricemia increase the risk of dementia, with the pooled hazard ratio of 1.07 (95% CI, 1.04–1.10). In consideration of the high

1  
2  
3  
4 heterogeneity of the included articles, we prefer the results given by the random-effects  
5  
6 model.  
7

8  
9 In our study of meta-analysis, we found that it did not increase the risk of dementia among  
10  
11 patients with gout or hyperuricemia, with the pooled hazard ratio of 0.94 (95% CI, 0.69–1.28),  
12  
13 with an  $I^2$  of 98%,  $P < 0.001$ (Figure 2). While there is a decreased risk of AD in gout or  
14  
15 hyperuricemia, with the pooled hazard ratio of 0.78 (95% CI, 0.64–0.95), with an  $I^2$  of 55%,  
16  
17  $P=0.01$ (Figure 3).The reasons for high heterogeneity are considered to be related to  
18  
19 differences in countries, environmental factors, methodological factors in design, and clinical  
20  
21 features et al.  
22  
23  
24  
25  
26  
27  
28  
29

## 30 **DISCUSSION**

31  
32 This meta-analysis is based on cohort studies in different countries, thus provide a  
33  
34 comprehensive evaluation on the association between dementia and gout or hyperuricemia.  
35  
36 All studies were assessed high quality by Newcastle–Ottawa Scale. The included studies had  
37  
38 adjustments for other risk factors.Our meta-analysis showed no statistically significant risk of  
39  
40 dementia in patients with gout or hyperuricemia compared with non-gout or  
41  
42 non-hyperuricemia controls. By contrast, gout or hyperuricemia is negatively correlated with  
43  
44 the risk of AD. The existing researches hold different views on the pathophysiological  
45  
46 mechanism of the relationship between gout and dementia. Whether the level of high uric  
47  
48 acid has protective or harmful effects on dementia has not been uniformly summarized.  
49  
50  
51  
52  
53  
54

55  
56 Several studies indicated that inflammatory pathways may play an important role in  
57  
58 increasing the risk of dementia<sup>15 16</sup>. Autoimmune disease, as a chronic disorder, has been  
59  
60

1  
2  
3  
4 suggested that be associated with the incidence of dementia. Scientists suggested that  
5  
6 systemic lupus erythematosus (SLE) and antiphospholipid syndrome (APS) also have a higher  
7  
8 risk of dementia<sup>3 17-20</sup>. Moreover, an 13-year, nationwide, population-based retrospective  
9  
10 cohort study showed that patients with Sjogren's syndrome (SS) have a higher risk of  
11  
12 dementia<sup>21 22</sup>. But there is no unified conclusion about the relationship between dementia and  
13  
14 gout or hyperuricemia, which is the original intention of our meta-analysis study.  
15  
16  
17

18  
19 Recently there is still controversy about whether gout or hyperuricemia and dementia are  
20  
21 related. There are several speculations about the mechanism of gout affecting the onset of  
22  
23 dementia. Some scholars believe that gout or hyperuricemia may increase the risk of  
24  
25 dementia<sup>8 14</sup> because of chronic inflammation from gout has some effect on the brain. Some  
26  
27 studies suggested that high inflammatory cytokines levels in brains with neurodegeneration  
28  
29 play important roles in the pathogenesis of dementia<sup>23-25</sup>. Others suggested that gout is  
30  
31 associated with oxidative stress, which may play a key role in the pathogenesis of dementia<sup>26</sup>  
32  
33 <sup>27</sup>. Besides, elevated inflammatory cytokines could damage endothelial cell, activate  
34  
35 inflammatory cells, and cause oxidative stress, which promoted the progression of  
36  
37 atherosclerosis<sup>24 28</sup>. Atherosclerotic cardiovascular diseases are well-established risk factors  
38  
39 for dementia<sup>29</sup>. Additionally, some evidence show that the association of hyperuricemia with  
40  
41 cardiovascular disease is due to concomitant oxidative stress<sup>30</sup>. In conclusion, chronic  
42  
43 inflammation and oxidative stress may be the final pathway in dementia and gout or  
44  
45 hyperuricemia, which may explain the high risk of dementia in elderly people with gout or  
46  
47 hyperuricemia.  
48  
49  
50  
51  
52  
53  
54  
55  
56

57  
58 On the contrary, some scholars confirm that gout or hyperuricemia may decrease the risk of  
59  
60

1  
2  
3  
4 dementia<sup>7 9</sup>. Uric acid was proposed to have both a pro-oxidant effect<sup>31</sup> and an anti-oxidant  
5  
6 effect<sup>32 33</sup>. Uric acid is an antioxidant and metal chelator properties in vitro<sup>34 35</sup>, could  
7  
8 effectively clear peroxynitrite and hydroxyl radicals<sup>32 36 37</sup> and reduce oxidative stress as an  
9  
10 antioxidant, may exert possible neuroprotective effects. What's more, it is reported that  
11  
12 pathogenesis of AD is related to mitochondrial dysfunction. Some studies showed that uric  
13  
14 acid might preserve mitochondrial function and suppress oxyradical accumulation<sup>32</sup>, thus  
15  
16 inhibiting cytotoxic activity of lactoperoxidase<sup>38</sup> and repairing free radical-induced DNA  
17  
18 damage<sup>39</sup>. In our study, we analyzed the AD subgroup of dementia and found that gout can  
19  
20 reduce the risk of AD. It might also confirm the neuroprotective role of uric acid.  
21  
22  
23  
24  
25

26  
27 Our study found that there is no correlation between dementia and gout or hyperuricemia.  
28  
29 Dementia has variable clinical symptoms, multiple subtypes, and complex pathogenesis,  
30  
31 which may explain the contradictory results of studies on gout or hyperuricemia. More  
32  
33 researches are needed to support the viewpoint. The risk of AD is inversely proportional to  
34  
35 gout, and the neuroprotective mechanism of uric acid may play a dominant role in the  
36  
37 pathogenesis of AD.  
38  
39  
40  
41  
42

43 However, there are some potential limitations exist in our study. Firstly, there are four studies  
44  
45 in our meta-analysis, whose number of articles included is relatively small. Besides, cohort  
46  
47 studies were mostly medical registry-based studies, which would raise a concern over coding  
48  
49 inaccuracy and misclassification. Secondly, although studies included had been adjusted for  
50  
51 other risk factors, the statistical heterogeneity was high, which might attribute to differences  
52  
53 in countries, environmental factors, ethodological factors in design, and clinical features.  
54  
55  
56  
57

58 Thirdly, this is a pooled analysis of observational studies, which can only demonstrate an  
59  
60

1  
2  
3  
4 association but not causality. Therefore, we cannot determine the impact of gout or  
5  
6 hyperuricemia or other unknown confounding factors on the outcome of dementia risk.  
7

8  
9 What's more, in sensitivity analysis, we found that the results were unstable by using  
10  
11 different analysis models. Considering the high heterogeneity of the included articles, we  
12  
13 prefer the results given by the random-effects model. As mentioned before, they call for  
14  
15 caution in interpreting the present meta-analysis findings.  
16  
17

18  
19 Our meta-analysis of cohort studies suggests that there is no risk of dementia among patients  
20  
21 with gout and hyperuricemia. However, high uric acid levels have a protective effect on  
22  
23 Alzheimer's disease. More investigations are needed to demonstrate the potential relationship  
24  
25 between dementia and patients with gout and hyperuricemia.  
26  
27  
28  
29  
30  
31

32  
33 **Contributors** Conceptualization: YL. Methodology: S-YP and R-JC. Formal analysis: Z-JX;  
34  
35 Data curation: Q-PZ. Writing original draft preparation: S-YP and R-JC. Writing - review and  
36  
37 editing: YL. Approval of final manuscript: all authors.  
38  
39

40  
41 **Funding** The present work was supported by the National Key Research and Development  
42  
43 Program of China (Project no.2016YFC0906201) to YL, 1.3.5 project for disciplines of  
44  
45 excellence, West China Hospital, Sichuan University (Project no. ZYGD18015) to YL.  
46  
47

48 **Competing interests** None declared.  
49

50 **Patient and public involvement** No patient involved.  
51

52 **Provenance and peer review** Not commissioned; externally peer reviewed.  
53

54 **Data sharing statement** No additional data are available.  
55  
56  
57  
58  
59  
60

## REFERENCES

1. Prince M, Bryce R, Albanese E, et al. The global prevalence of dementia: a systematic review and metaanalysis. *Alzheimer's & dementia : the journal of the Alzheimer's Association* 2013;9(1):63-75.e2. doi: 10.1016/j.jalz.2012.11.007 [published Online First: 2013/01/12]
2. Ungprasert P, Wijarnpreecha K, Thongprayoon C. Rheumatoid arthritis and the risk of dementia: A systematic review and meta-analysis. *Neurology India* 2016;64(1):56-61. doi: 10.4103/0028-3886.173623 [published Online First: 2016/01/13]
3. Gendelman O, Tiosano S, Shoenfeld Y, et al. High proportions of dementia among SLE patients: A big data analysis. *International journal of geriatric psychiatry* 2018;33(3):531-36. doi: 10.1002/gps.4819 [published Online First: 2017/11/09]
4. Bae JS, Shin DH, Park PS, et al. The impact of serum uric acid level on arterial stiffness and carotid atherosclerosis: the Korean Multi-Rural Communities Cohort study. *Atherosclerosis* 2013;231(1):145-51. doi: 10.1016/j.atherosclerosis.2013.08.017 [published Online First: 2013/10/16]
5. Lai SW, Lin CL, Liao KF. No association between gout and Alzheimer's disease: Results of a case-control study in older people in Taiwan. *International journal of geriatric psychiatry* 2013;28(11):1205-06.
6. Engel B, Gomm W, Broich K, et al. Hyperuricemia and dementia - a case-control study. *BMC neurology* 2018;18 (1) (no pagination)(131)
7. Lu N, Dubreuil M, Zhang Y, et al. Gout and the risk of Alzheimer's disease: A population-based, BMI-matched cohort study. *Ann Rheum Dis* 2016;75(3):547-51.
8. Latourte A, Soumare A, Bardin T, et al. Uric acid and incident dementia over 12 years of follow-up: a population-based cohort study. *Ann Rheum Dis* 2018;77(3):328-35.
9. Hong JY, Lan TY, Tang GJ, et al. Gout and the risk of dementia: A nationwide population-based cohort study. *Arthritis Research and Therapy* 2015;17 (1) (no pagination)(139)
10. Lu N, Dubreuil M, Zhang Y, et al. Gout and the risk of Alzheimer's disease: a population-based, BMI-matched cohort study. *Ann Rheum Dis* 2016;75(3):547-51. doi: 10.1136/annrheumdis-2014-206917 [published Online First: 2015/03/06]
11. Schretlen DJ, Inscore AB, Jinnah HA, et al. Serum uric acid and cognitive function in community-dwelling older adults. *Neuropsychology* 2007;21(1):136-40. doi: 10.1037/0894-4105.21.1.136 [published Online First: 2007/01/05]
12. Higgins JP, Thompson SG. Quantifying heterogeneity in a meta-analysis. *Statistics in medicine* 2002;21(11):1539-58. doi: 10.1002/sim.1186 [published Online First: 2002/07/12]
13. Higgins JP, Thompson SG, Deeks JJ, et al. Measuring inconsistency in meta-analyses. *BMJ (Clinical research ed)* 2003;327(7414):557-60. doi: 10.1136/bmj.327.7414.557 [published Online First: 2003/09/06]
14. Singh JA, Cleveland JD. Gout and dementia in the elderly: a cohort study of Medicare claims. *BMC geriatrics* 2018;18(1):281.
15. Wallin K, Solomon A, Kareholt I, et al. Midlife rheumatoid arthritis increases the risk of cognitive impairment two decades later: a population-based study. *Journal of Alzheimer's disease : JAD* 2012;31(3):669-76. doi: 10.3233/jad-2012-111736 [published Online First: 2012/06/01]

16. Dregan A, Chowienczyk P, Gulliford MC. Are Inflammation and Related Therapy Associated with All-Cause Dementia in a Primary Care Population? *Journal of Alzheimer's disease : JAD* 2015;46(4):1039-47. doi: 10.3233/jad-150171 [published Online First: 2015/09/25]
17. Lin YR, Chou LC, Chen HC, et al. Increased Risk of Dementia in Patients With Systemic Lupus Erythematosus: A Nationwide Population-Based Cohort Study. *Arthritis care & research* 2016;68(12):1774-79. doi: 10.1002/acr.22914 [published Online First: 2016/04/26]
18. Atzeni F, Pipitone N, Iaccarino L, et al. Rheumatic diseases and autoimmune vascular dementia. *Autoimmunity reviews* 2017;16(12):1265-69. doi: 10.1016/j.autrev.2017.10.011 [published Online First: 2017/10/19]
19. Wotton CJ, Goldacre MJ. Associations between specific autoimmune diseases and subsequent dementia: retrospective record-linkage cohort study, UK. *Journal of epidemiology and community health* 2017;71(6):576-83. doi: 10.1136/jech-2016-207809 [published Online First: 2017/03/03]
20. Bucci T, Menichelli D, Pignatelli P, et al. Relationship of Antiphospholipid Antibodies to Risk of Dementia: A Systematic Review. *Journal of Alzheimer's disease : JAD* 2019;69(2):561-76. doi: 10.3233/jad-181294 [published Online First: 2019/05/20]
21. Chen HH, Perng WT, Chiou JY, et al. Risk of dementia among patients with Sjogren's syndrome: A nationwide population-based cohort study in Taiwan. *Seminars in arthritis and rheumatism* 2019;48(5):895-99. doi: 10.1016/j.semarthrit.2018.06.007 [published Online First: 2018/08/05]
22. Watad A, Bragazzi NL, Tiosano S, et al. Alzheimer's Disease in Systemic Sclerosis Patients: A Nationwide Population-Based Cohort Study. *Journal of Alzheimer's disease : JAD* 2018;65(1):117-24. doi: 10.3233/jad-180516 [published Online First: 2018/07/25]
23. Campbell IL, Stalder AK, Chiang CS, et al. Transgenic models to assess the pathogenic actions of cytokines in the central nervous system. *Molecular psychiatry* 1997;2(2):125-9. [published Online First: 1997/03/01]
24. Rafnsson SB, Deary IJ, Smith FB, et al. Cognitive decline and markers of inflammation and hemostasis: the Edinburgh Artery Study. *J Am Geriatr Soc* 2007;55(5):700-7. doi: 10.1111/j.1532-5415.2007.01158.x [published Online First: 2007/05/12]
25. Schram MT, Euser SM, de Craen AJ, et al. Systemic markers of inflammation and cognitive decline in old age. *J Am Geriatr Soc* 2007;55(5):708-16. doi: 10.1111/j.1532-5415.2007.01159.x [published Online First: 2007/05/12]
26. Pratico D, Uryu K, Leight S, et al. Increased lipid peroxidation precedes amyloid plaque formation in an animal model of Alzheimer amyloidosis. *The Journal of neuroscience : the official journal of the Society for Neuroscience* 2001;21(12):4183-7. [published Online First: 2001/06/19]
27. Lin MT, Beal MF. Mitochondrial dysfunction and oxidative stress in neurodegenerative diseases. *Nature* 2006;443(7113):787-95. doi: 10.1038/nature05292 [published Online First: 2006/10/20]
28. Libby P. Inflammation in atherosclerosis. *Nature* 2002;420(6917):868-74. doi: 10.1038/nature01323 [published Online First: 2002/12/20]
29. Dufouil C, Seshadri S, Chene G. Cardiovascular risk profile in women and dementia. *Journal of Alzheimer's disease : JAD* 2014;42 Suppl 4:S353-63. doi: 10.3233/jad-141629 [published Online First: 2014/10/30]

- 1  
2  
3  
4  
5  
6  
7  
8  
9  
10  
11  
12  
13  
14  
15  
16  
17  
18  
19  
20  
21  
22  
23  
24  
25  
26  
27  
28  
29  
30  
31  
32  
33  
34  
35  
36  
37  
38  
39  
40  
41  
42  
43  
44  
45  
46  
47  
48  
49  
50  
51  
52  
53  
54  
55  
56  
57  
58  
59  
60
30. Coyle JT, Puttfarcken P. Oxidative stress, glutamate, and neurodegenerative disorders. *Science (New York, NY)* 1993;262(5134):689-95. doi: 10.1126/science.7901908 [published Online First: 1993/10/29]
31. Kanellis J, Kang DH. Uric acid as a mediator of endothelial dysfunction, inflammation, and vascular disease. *Semin Nephrol* 2005;25(1):39-42. [published Online First: 2005/01/22]
32. Yu ZF, Bruce-Keller AJ, Goodman Y, et al. Uric acid protects neurons against excitotoxic and metabolic insults in cell culture, and against focal ischemic brain injury in vivo. *Journal of neuroscience research* 1998;53(5):613-25. doi: 10.1002/(sici)1097-4547(19980901)53:5<613::aid-jnr11>3.0.co;2-1 [published Online First: 1998/09/03]
33. Squadrito GL, Cueto R, Splenser AE, et al. Reaction of uric acid with peroxynitrite and implications for the mechanism of neuroprotection by uric acid. *Archives of biochemistry and biophysics* 2000;376(2):333-7. doi: 10.1006/abbi.2000.1721 [published Online First: 2000/04/25]
34. Ames BN, Cathcart R, Schwiers E, et al. Uric acid provides an antioxidant defense in humans against oxidant- and radical-caused aging and cancer: a hypothesis. *Proc Natl Acad Sci U S A* 1981;78(11):6858-62. doi: 10.1073/pnas.78.11.6858 [published Online First: 1981/11/01]
35. Davies KJ, Sevanian A, Muakkassah-Kelly SF, et al. Uric acid-iron ion complexes. A new aspect of the antioxidant functions of uric acid. *The Biochemical journal* 1986;235(3):747-54. doi: 10.1042/bj2350747 [published Online First: 1986/05/01]
36. Hooper DC, Spitsin S, Kean RB, et al. Uric acid, a natural scavenger of peroxynitrite, in experimental allergic encephalomyelitis and multiple sclerosis. *Proc Natl Acad Sci U S A* 1998;95(2):675-80. doi: 10.1073/pnas.95.2.675 [published Online First: 1998/01/22]
37. Waring WS, Webb DJ, Maxwell SR. Systemic uric acid administration increases serum antioxidant capacity in healthy volunteers. *Journal of cardiovascular pharmacology* 2001;38(3):365-71. doi: 10.1097/00005344-200109000-00005 [published Online First: 2001/08/07]
38. Everse J, Coates PW. The cytotoxic activity of lactoperoxidase: enhancement and inhibition by neuroactive compounds. *Free radical biology & medicine* 2004;37(6):839-49. [published Online First: 2004/09/24]
39. Anderson RF, Harris TA. Dopamine and uric acid act as antioxidants in the repair of DNA radicals: implications in Parkinson's disease. *Free radical research* 2003;37(10):1131-6. [published Online First: 2004/01/06]



**Table 1** Characteristics of included studies in the meta-analysis.

|                                         | Lu N et al. [7]                                                                                                                | LatourteA et al. [8]                                                                     | Hong JY et al. [9]                 | Singh JA et al. [14]                                                                                          |
|-----------------------------------------|--------------------------------------------------------------------------------------------------------------------------------|------------------------------------------------------------------------------------------|------------------------------------|---------------------------------------------------------------------------------------------------------------|
| Country                                 | UK                                                                                                                             | USA                                                                                      | Taiwan, China                      | France                                                                                                        |
| Study design                            | Cohort study                                                                                                                   | Cohort study                                                                             | Cohort study                       | Cohort study                                                                                                  |
| Year                                    | 2016                                                                                                                           | 2018                                                                                     | 2015                               | 2018                                                                                                          |
| Age, mean years                         | 65                                                                                                                             | 75.2                                                                                     | 63.5                               | 72.9                                                                                                          |
| Male, %                                 | 71                                                                                                                             | 42.6                                                                                     | 63                                 | 38.7                                                                                                          |
| Diagnosis of gout or Hyperuricemia      | diagnostic code using the Read classification                                                                                  | (ICD-9-CM) codes                                                                         | (ICD9-CM) codes                    | Hyperuricemia: $\geq 360$ $\mu\text{mol/L}$ for men, $\geq 300$ $\mu\text{mol/L}$ for women.                  |
| Diagnosis of dementia                   | AD diagnostic codes                                                                                                            | (ICD-9-CM) codes                                                                         | (ICD9-CM) codes                    | DSM-IV                                                                                                        |
| Subtype of dementia                     | AD                                                                                                                             | All subtypes of dementia                                                                 | All subtypes of dementia<br>AD, VD | All subtypes of dementia<br>AD                                                                                |
| number of dementia (cases vs controls)  | 309/1942                                                                                                                       | 5310/106346                                                                              | 1214/5905                          | 32/78                                                                                                         |
| Adjusted confounders                    | age, sex, entry-time, BMI, smoking, alcohol use, physician visits, social deprivation index, comorbidities and medication use. | age, sex, race, medical comorbidities, common medications for cardiac diseases and gout. | Age, sex, relevant comorbidities.  | adjusted for age, gender, tobacco and alcohol consumption, cholesterol, medical comorbidities, medication use |
| Follow-up years (mean or mean $\pm$ SD) | 5                                                                                                                              | 2.3 (1.7)                                                                                | 4.3(2.1)                           | 12                                                                                                            |
| Quality grading                         | 7 stars                                                                                                                        | 6 stars                                                                                  | 7 stars                            | 8 stars                                                                                                       |

(AD: Alzheimer's disease; VD: Vascular dementia; DSM-IV: diagnostic and Statistical Manual of Mental disorders Version IV; BMI: body mass index)

1  
2  
3  
4  
5  
6  
7  
8  
9  
10  
11  
12  
13  
14  
15  
16  
17  
18  
19  
20  
21  
22  
23  
24  
25  
26  
27  
28  
29  
30  
31  
32  
33  
34  
35  
36  
37  
38  
39  
40  
41  
42  
43  
44  
45  
46  
47  
48  
49  
50  
51  
52  
53  
54  
55  
56  
57  
58  
59  
60

For peer review only

**Figure 1** Flow diagram showing the identification and selection of cohort studies included in the review.

**Figure 2** Forest plot showing an association between dementia and patient's with gout and hyperuricemia

**Figure 3** Forest plot showing an association between AD and patient's with gout and hyperuricemia

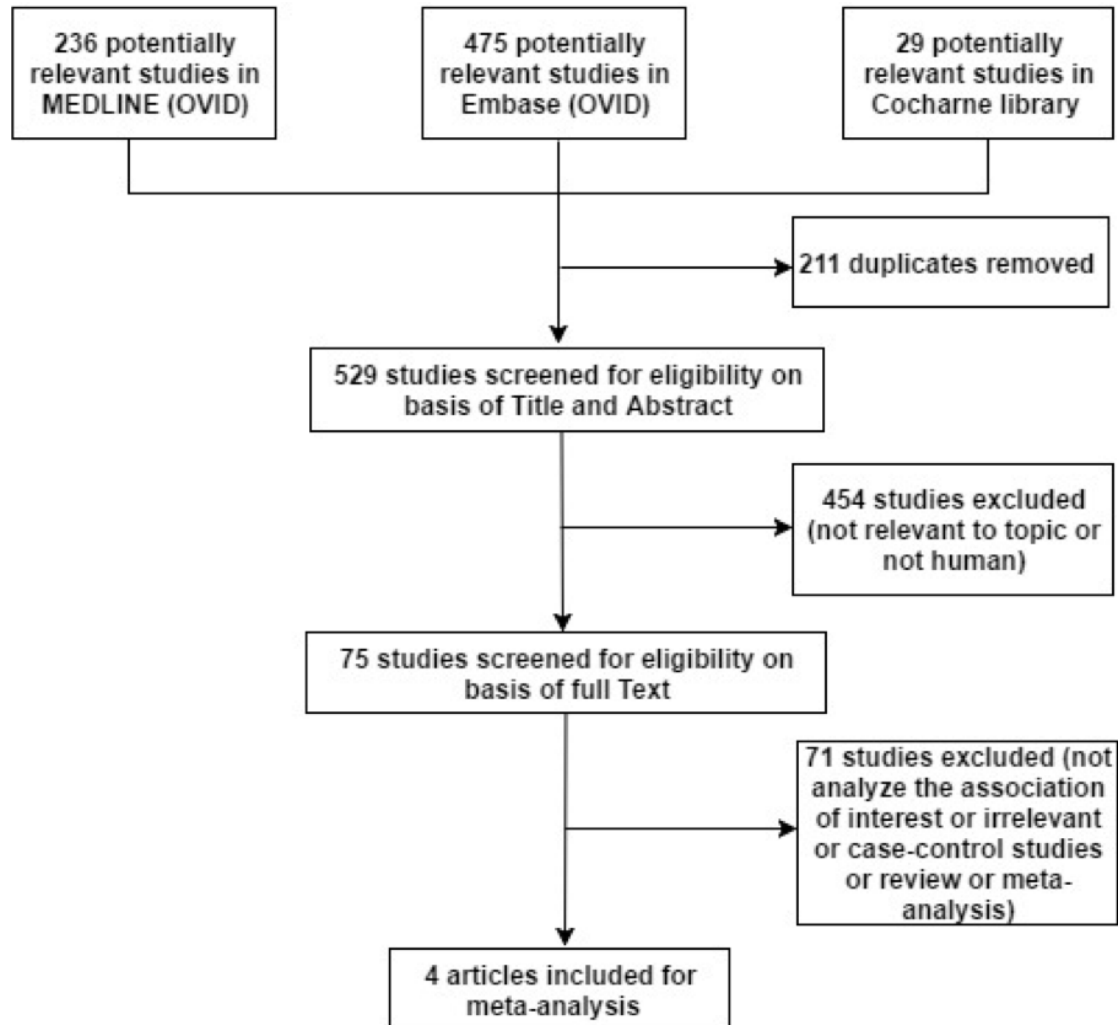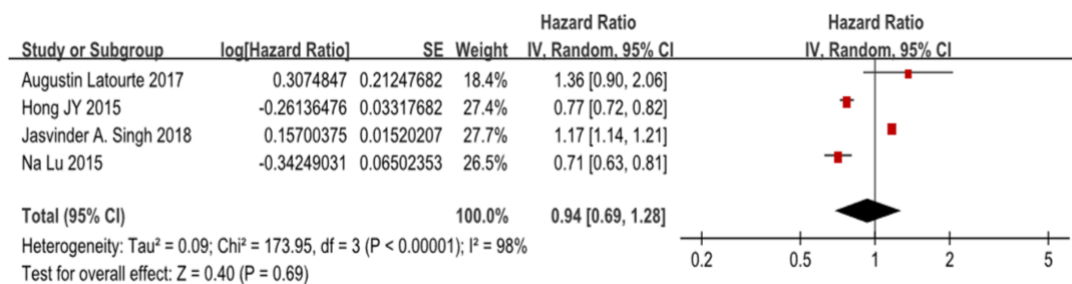

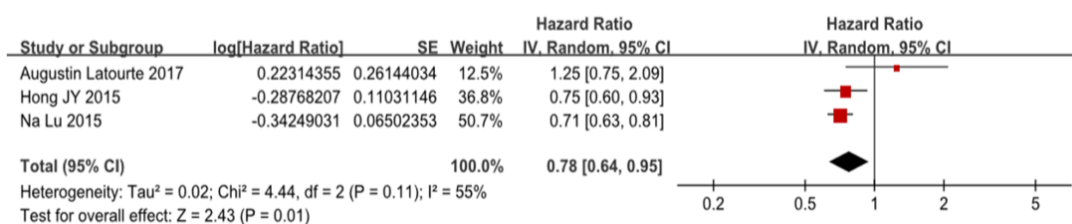

For peer review only

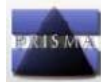

# PRISMA 2009 Checklist

| Section/topic                      | #  | Checklist item                                                                                                                                                                                                                                                                                              | Reported on page # |
|------------------------------------|----|-------------------------------------------------------------------------------------------------------------------------------------------------------------------------------------------------------------------------------------------------------------------------------------------------------------|--------------------|
| <b>TITLE</b>                       |    |                                                                                                                                                                                                                                                                                                             |                    |
| Title                              | 1  | Identify the report as a systematic review, meta-analysis, or both.                                                                                                                                                                                                                                         | P1                 |
| <b>ABSTRACT</b>                    |    |                                                                                                                                                                                                                                                                                                             |                    |
| Structured summary                 | 2  | Provide a structured summary including, as applicable: background; objectives; data sources; study eligibility criteria, participants, and interventions; study appraisal and synthesis methods; results; limitations; conclusions and implications of key findings; systematic review registration number. | P1-2               |
| <b>INTRODUCTION</b>                |    |                                                                                                                                                                                                                                                                                                             |                    |
| Rationale                          | 3  | Describe the rationale for the review in the context of what is already known.                                                                                                                                                                                                                              | P3                 |
| Objectives                         | 4  | Provide an explicit statement of questions being addressed with reference to participants, interventions, comparisons, outcomes, and study design (PICOS).                                                                                                                                                  | P3                 |
| <b>METHODS</b>                     |    |                                                                                                                                                                                                                                                                                                             |                    |
| Protocol and registration          | 5  | Indicate if a review protocol exists, if and where it can be accessed (e.g., Web address), and, if available, provide registration information including registration number.                                                                                                                               | none               |
| Eligibility criteria               | 6  | Specify study characteristics (e.g., PICOS, length of follow-up) and report characteristics (e.g., years considered, language, publication status) used as criteria for eligibility, giving rationale.                                                                                                      | P4-5               |
| Information sources                | 7  | Describe all information sources (e.g., databases with dates of coverage, contact with study authors to identify additional studies) in the search and date last searched.                                                                                                                                  | P4                 |
| Search                             | 8  | Present full electronic search strategy for at least one database, including any limits used, such that it could be repeated.                                                                                                                                                                               | P4                 |
| Study selection                    | 9  | State the process for selecting studies (i.e., screening, eligibility, included in systematic review, and, if applicable, included in the meta-analysis).                                                                                                                                                   | P4                 |
| Data collection process            | 10 | Describe method of data extraction from reports (e.g., piloted forms, independently, in duplicate) and any processes for obtaining and confirming data from investigators.                                                                                                                                  | P4                 |
| Data items                         | 11 | List and define all variables for which data were sought (e.g., PICOS, funding sources) and any assumptions and simplifications made.                                                                                                                                                                       | P4                 |
| Risk of bias in individual studies | 12 | Describe methods used for assessing risk of bias of individual studies (including specification of whether this was done at the study or outcome level), and how this information is to be used in any data synthesis.                                                                                      | P4                 |
| Summary measures                   | 13 | State the principal summary measures (e.g., risk ratio, difference in means).                                                                                                                                                                                                                               | P4                 |
| Synthesis of results               | 14 | Describe the methods of handling data and combining results of studies, if done, including measures of consistency (e.g., I <sup>2</sup> ) for each meta-analysis.                                                                                                                                          | P5                 |

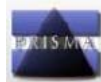

# PRISMA 2009 Checklist

Page 1 of 2

| Section/topic                 | #  | Checklist item                                                                                                                                                                                           | Reported on page # |
|-------------------------------|----|----------------------------------------------------------------------------------------------------------------------------------------------------------------------------------------------------------|--------------------|
| Risk of bias across studies   | 15 | Specify any assessment of risk of bias that may affect the cumulative evidence (e.g., publication bias, selective reporting within studies).                                                             | P5                 |
| Additional analyses           | 16 | Describe methods of additional analyses (e.g., sensitivity or subgroup analyses, meta-regression), if done, indicating which were pre-specified.                                                         | none               |
| <b>RESULTS</b>                |    |                                                                                                                                                                                                          |                    |
| Study selection               | 17 | Give numbers of studies screened, assessed for eligibility, and included in the review, with reasons for exclusions at each stage, ideally with a flow diagram.                                          | P6                 |
| Study characteristics         | 18 | For each study, present characteristics for which data were extracted (e.g., study size, PICOS, follow-up period) and provide the citations.                                                             | P6                 |
| Risk of bias within studies   | 19 | Present data on risk of bias of each study and, if available, any outcome level assessment (see item 12).                                                                                                | P6                 |
| Results of individual studies | 20 | For all outcomes considered (benefits or harms), present, for each study: (a) simple summary data for each intervention group (b) effect estimates and confidence intervals, ideally with a forest plot. | P6                 |
| Synthesis of results          | 21 | Present results of each meta-analysis done, including confidence intervals and measures of consistency.                                                                                                  | P6-7               |
| Risk of bias across studies   | 22 | Present results of any assessment of risk of bias across studies (see Item 15).                                                                                                                          | P6-7               |
| Additional analysis           | 23 | Give results of additional analyses, if done (e.g., sensitivity or subgroup analyses, meta-regression [see Item 16]).                                                                                    | none               |
| <b>DISCUSSION</b>             |    |                                                                                                                                                                                                          |                    |
| Summary of evidence           | 24 | Summarize the main findings including the strength of evidence for each main outcome; consider their relevance to key groups (e.g., healthcare providers, users, and policy makers).                     | P7-9               |
| Limitations                   | 25 | Discuss limitations at study and outcome level (e.g., risk of bias), and at review-level (e.g., incomplete retrieval of identified research, reporting bias).                                            | P9-10              |
| Conclusions                   | 26 | Provide a general interpretation of the results in the context of other evidence, and implications for future research.                                                                                  | P10                |
| <b>FUNDING</b>                |    |                                                                                                                                                                                                          |                    |
| Funding                       | 27 | Describe sources of funding for the systematic review and other support (e.g., supply of data); role of funders for the systematic review.                                                               | P10                |

From: Moher D, Liberati A, Tetzlaff J, Altman DG, The PRISMA Group (2009). Preferred Reporting Items for Systematic Reviews and Meta-Analyses: The PRISMA Statement. PLoS Med 6(6): e1000097. doi:10.1371/journal.pmed1000097

For more information, visit: [www.prisma-statement.org](http://www.prisma-statement.org).

Page 2 of 2

For peer review only - <http://bmjopen.bmj.com/site/about/guidelines.xhtml>

# BMJ Open

## The risk of dementia in gout and hyperuricemia: A meta-analysis of cohort studies

|                                 |                                                                                                                                                                                                                                                                                                                                                                                                                                                                 |
|---------------------------------|-----------------------------------------------------------------------------------------------------------------------------------------------------------------------------------------------------------------------------------------------------------------------------------------------------------------------------------------------------------------------------------------------------------------------------------------------------------------|
| Journal:                        | <i>BMJ Open</i>                                                                                                                                                                                                                                                                                                                                                                                                                                                 |
| Manuscript ID                   | bmjopen-2020-041680.R1                                                                                                                                                                                                                                                                                                                                                                                                                                          |
| Article Type:                   | Original research                                                                                                                                                                                                                                                                                                                                                                                                                                               |
| Date Submitted by the Author:   | 25-Nov-2020                                                                                                                                                                                                                                                                                                                                                                                                                                                     |
| Complete List of Authors:       | pan, shu-yue; Sichuan University West China Hospital, Cheng, Rui-Juan; Sichuan University West China Hospital, Department of Rheumatology and Immunology<br>Xia, Zi-jing; Sichuan University West China Hospital, Department of Rheumatology and Immunology<br>Zhang, Qiu-Ping; Sichuan University West China Hospital, Department of Rheumatology and Immunology<br>Liu, Yi; Sichuan University West China Hospital, Department of Rheumatology and Immunology |
| <b>Primary Subject Heading</b>: | Neurology                                                                                                                                                                                                                                                                                                                                                                                                                                                       |
| Secondary Subject Heading:      | Rheumatology                                                                                                                                                                                                                                                                                                                                                                                                                                                    |
| Keywords:                       | INTERNAL MEDICINE, Dementia < NEUROLOGY, Stroke < NEUROLOGY, Neurology < INTERNAL MEDICINE, Rheumatology < INTERNAL MEDICINE                                                                                                                                                                                                                                                                                                                                    |
|                                 |                                                                                                                                                                                                                                                                                                                                                                                                                                                                 |

SCHOLARONE™  
Manuscripts



I, the Submitting Author has the right to grant and does grant on behalf of all authors of the Work (as defined in the below author licence), an exclusive licence and/or a non-exclusive licence for contributions from authors who are: i) UK Crown employees; ii) where BMJ has agreed a CC-BY licence shall apply, and/or iii) in accordance with the terms applicable for US Federal Government officers or employees acting as part of their official duties; on a worldwide, perpetual, irrevocable, royalty-free basis to BMJ Publishing Group Ltd ("BMJ") its licensees and where the relevant Journal is co-owned by BMJ to the co-owners of the Journal, to publish the Work in this journal and any other BMJ products and to exploit all rights, as set out in our [licence](#).

The Submitting Author accepts and understands that any supply made under these terms is made by BMJ to the Submitting Author unless you are acting as an employee on behalf of your employer or a postgraduate student of an affiliated institution which is paying any applicable article publishing charge ("APC") for Open Access articles. Where the Submitting Author wishes to make the Work available on an Open Access basis (and intends to pay the relevant APC), the terms of reuse of such Open Access shall be governed by a Creative Commons licence – details of these licences and which [Creative Commons](#) licence will apply to this Work are set out in our licence referred to above.

Other than as permitted in any relevant BMJ Author's Self Archiving Policies, I confirm this Work has not been accepted for publication elsewhere, is not being considered for publication elsewhere and does not duplicate material already published. I confirm all authors consent to publication of this Work and authorise the granting of this licence.



## The risk of dementia in gout and hyperuricemia: A meta-analysis of cohort studies

Shu-Yue Pan<sup>1,2,+</sup>, Rui-Juan Cheng<sup>1,+</sup>, Zi-Jing Xia<sup>1</sup>, Qiu-Ping Zhang<sup>1</sup>, Yi Liu<sup>1,\*</sup>

<sup>1</sup>Department of Rheumatology and Immunology, West China Hospital, Sichuan University, Chengdu, Sichuan, China.

<sup>2</sup>Department of Rheumatology and Immunology, Chengdu Fifth People's Hospital, Chengdu, Sichuan, China.

\*Corresponding author: Yi Liu

Department of Rheumatology and Immunology, West China Hospital, Sichuan University, No.37 Guoxue Alley, Wuhou District, Chengdu City, Sichuan Province, PR China.

Tel:18980602061

E-mail address: [yi2006liu@163.com](mailto:yi2006liu@163.com)

<sup>+</sup>Shu-Yue Pan and Rui-Juan Cheng are co-first authors.

Word count: 3891 words

### Abstract

**Objectives:** Gout, characterized by hyperuricemia with monosodium urate crystal formation and inflammation, is the most common inflammatory arthritis in adults. Recent studies have found that elevated uric acid levels are related to the occurrence of dementia. We conducted a

1  
2  
3  
4 study to investigate the association between dementia and gout or hyperuricemia.  
5  
6

7 **Design:** Systematic review and meta-analysis of cohort studies  
8

9 **Data sources:** Studies were screened from inception to June 28, 2019, by searching Medline,  
10  
11  
12  
13  
14  
15  
16  
17  
18  
19  
20  
21  
22  
23  
24  
25  
26  
27  
28  
29  
30  
31  
32  
33  
34  
35  
36  
37  
38  
39  
40  
41  
42  
43  
44  
45  
46  
47  
48  
49  
50  
51  
52  
53  
54  
55  
56  
57  
58  
59  
60  
EMBASE, and the Cochrane library databases.

**Eligibility criteria:** Cohort studies comparing the risk of dementia in patients with gout and hyperuricemia versus non-gout and non-hyperuricemia controls were enrolled.

**Data extraction and analysis:** Two reviewers separately selected studies and extracted data using the Medical Subject Headings without restriction on languages or countries. The adjusted hazard ratios (HRs) were pooled using the DerSimonian and Laird random-effects model. Sensitivity analyses were conducted to evaluate the stability of the results. Publication bias was evaluated using Egger's and Begg's tests. Quality assessment was performed according to the Newcastle–Ottawa scale.

**Results:** Four cohort studies that met the inclusion criteria were included in our meta-analysis. We found that gout and hyperuricemia did not increase the risk of dementia, with a pooled HR of 0.94 (95% CI, 0.69, 1.28), but might decrease the risk of Alzheimer's disease (AD), with a pooled hazard ratio of 0.78 (95% CI, 0.64, 0.95). There was little evidence of publication bias. Quality assessment of the included studies was high (range, 6–8 points).

**Conclusions:** Our study shows that gout and hyperuricemia do not increase the risk of dementia. However, gout and hyperuricemia might have a protective effect against AD. Due to the limited number of research articles, more investigations are needed to demonstrate the potential relationship between dementia and gout or hyperuricemia.

1  
2  
3  
4 **Keywords:** Alzheimer's disease; dementia; gout; hyperuricemia; meta-analysis  
5

6 **Strengths and limitations of this study:**  
7

- 8
- 9 ● We conducted a meta-analysis of cohort studies to compare the risk of dementia in  
10 patients with gout and hyperuricemia.  
11
  - 12 ● As there are few meta-analyses of cohort studies on dementia and gout, our research  
13 provides a basis for future research.  
14
  - 15 ● The results of our meta-analysis should be interpreted with caution due to the small  
16 number and high heterogeneity of the included studies.  
17
  - 18 ● Differences in countries, environmental factors, and clinical features, and lack of  
19 uniformity in study designs, inclusion criteria, and follow-up durations were the main  
20 sources of heterogeneity in our study.  
21  
22  
23  
24  
25  
26  
27  
28  
29  
30  
31  
32  
33  
34

35 **INTRODUCTION**  
36

37 With the aging of the population and the improvement in living standards, the incidence of  
38 ageing-related cerebrovascular diseases and metabolic diseases is increasing. Dementia is a  
39 common age-dependent disorder characterized by progressive deterioration of cognitive  
40 ability and function, which can be caused by primary neurologic, neuropsychiatric, and other  
41 conditions, such as traumatic brain injury and tumors. Most senile dementias are caused by  
42 neurodegeneration. Common diseases include Alzheimer's disease, vascular dementia, Lewy  
43 body dementia, frontotemporal degeneration, and Parkinson's disease.<sup>1</sup> Notably, the number  
44 of patients with dementia worldwide is expected to increase to 115 million by 2050.<sup>2</sup>  
45  
46  
47  
48  
49  
50  
51  
52  
53  
54  
55  
56  
57  
58  
59  
60

1  
2  
3  
4 Therefore, it is essential to study the pathogenesis of dementia to improve prevention and  
5  
6 treatment of this condition.  
7  
8

9 With changes in diet and increases in obesity, the incidence of hyperuricemia also continues  
10  
11 to rise. Hyperuricemia is caused by increased production of uric acid in and/or decreased  
12  
13 excretion of uric acid from the body.<sup>3</sup> Hyperuricemia may not cause obvious clinical  
14  
15 symptoms for a long time, but with a persistent increase in blood uric acid levels, urate  
16  
17 deposition may occur, which can damage tissues and internal organs. In fact, hyperuricemia  
18  
19 not only causes gout, but is also an independent risk factor for cardiovascular disease and  
20  
21 chronic kidney disease.<sup>4</sup> Gout is the most common inflammatory arthritis in adults. Common  
22  
23 hallmarks of gout include hyperuricemia, monosodiumurate crystal formation, and gouty  
24  
25 arthritis.  
26  
27  
28  
29  
30  
31

32 Moreover, several epidemiological studies have reported an association between chronic  
33  
34 inflammation and dementia. In recent years, blood uric acid levels have been considered to be  
35  
36 closely related to neurodegenerative changes in Parkinson's disease and Alzheimer's disease  
37  
38 (AD).<sup>5</sup> Many studies have evaluated the relationship between uric acid and cognitive  
39  
40 impairment disorders.<sup>6-10</sup> The findings of Lu et al.<sup>8</sup> supported the potential neuroprotective  
41  
42 function of uric acid. In contrast, Schretlen et al.<sup>11</sup> found that elevated blood uric acid levels  
43  
44 increased the risk of cognitive impairment. Thus, whether uric acid predisposes to or protects  
45  
46 against dementia remains unclear.  
47  
48  
49  
50  
51

52 Thus, we here performed a systematic review and meta-analysis of the data reported by  
53  
54 cohort studies on the association between dementia and gout or hyperuricemia.  
55  
56  
57  
58  
59  
60

## METHODS

A comprehensive literature search was conducted to identify all relevant articles in the Medline (Ovid), Embase (Ovid), and Cochrane Library databases, from their respective inception dates until June 28, 2019. Two independent reviewers searched the databases systemically and extensively to obtain studies about the association between dementia and gout or hyperuricemia, without any language or country restrictions. The Medical Subject Heading (MeSH) terms “gout”, “hyperuricemia,” and “dementia” were used in the search strategy.

Data abstraction was performed by two independent reviewers using a unified form. From each primary study, we extracted the following information: the first author’s last name, year of publication, country where the study was performed, sample size, mean age, proportion of men, diagnostic criteria, subtype of dementia, average duration of follow-up years, adjusted covariates, quality of assessment, and adjusted hazard ratio (HR) and 95% confidence interval (CI).

The quality of the studies was scored according to the Newcastle-Ottawa scale, where a higher score ( $\geq 5$  points) represents better quality. Three major components were scored: selection (0–4 points), comparability (0–2 points), and outcome (0–3 points).

### **Inclusion and exclusion criteria**

Two investigators read the title and abstracts of all identified papers and evaluated the literature eligibility independently. Then, we obtained full reports from the articles that appeared eligible, and two investigators again independently assessed whether the papers met

1  
2  
3  
4 the following inclusion criteria: (1) cohort study; (2) original, peer-reviewed study; (3) risk  
5  
6 estimates of dementia morbidity in gout or hyperuricemia patients compared with non-gout or  
7  
8 non-hyperuricemia controls, with dementia occurring after gout or hyperuricemia; (4)  
9  
10 adjusted hazard ratio (HR) can be extracted or calculated; and (5) clearly stated dementia (any  
11  
12 type, including vascular dementia and AD), gout, and hyperuricemia diagnostic criteria; and  
13  
14  
15 (6) if multiple studies were reported from the same center and using the same patient  
16  
17 population, we selected the study with the largest sample size or with the most comprehensive  
18  
19 data for the meta-analysis. The following reports were excluded: (1) conference articles,  
20  
21 review articles, editorials, commentaries, hypothesis papers, case reports, and letters; (2)  
22  
23 multiple publications from the same population; (3) studies without a control group; (4)  
24  
25 studies without clear definition of hyperuricemia, gout, or dementia; (5) studies with dementia  
26  
27 occurring before the onset of gout or hyperuricemia.  
28  
29  
30  
31  
32  
33  
34  
35  
36  
37

### 38 **Statistical analysis**

39  
40 Review Manager 5.3 software was used to calculate the pooled effect size estimate. The  
41  
42 adjusted hazard ratios (HRs) were pooled using the DerSimonian and Laird random-effects  
43  
44 model, and the weights were equal to the inverse variance of each study's effect estimation.  
45  
46 Forest plots were produced for visual assessment of the HRs and corresponding 95% CIs  
47  
48 across studies. Heterogeneity of HRs across studies was evaluated using the Cochrane Q  
49  
50 statistic and the  $I^2$  statistic (values of 25%, 50%, and 75% were considered to represent low,  
51  
52 medium, and high heterogeneity, respectively).<sup>12 13</sup> Sensitivity analysis was conducted to  
53  
54 evaluate the stability of the results. Publication bias was evaluated using Egger's and Begg's  
55  
56  
57  
58  
59  
60

1  
2  
3  
4 tests.  
5  
6  
7  
8

## 9 **RESULTS**

10  
11 A flow diagram of the selection process is presented in Figure 1. A total of 740 potentially  
12 relevant articles were identified by keyword search from the electronic databases. After the  
13 initial screening based on titles and abstracts, 665 articles were excluded. Full-text evaluation  
14 was conducted in the remaining 75 articles, and 71 articles were excluded due to irrelevant  
15 topics or because of being case-control, review, or meta-analysis reports, or because of not  
16 fulfilling our inclusion criteria. Ultimately, four cohort studies were selected for the  
17 meta-analysis.<sup>8-10 14</sup>  
18  
19  
20  
21  
22  
23  
24  
25  
26  
27  
28  
29

30 The characteristics of the included studies are shown in Table 1. All four studies included  
31 both men and women, and the average age of participants was  $\geq 60$  years. These studies were  
32 conducted primarily in the UK, USA, Taiwan, China, and France. The study samples ranged  
33 from 406 to 1,712,821, and the follow-up durations ranged from 2.3 to 12 years. We used the  
34 Newcastle-Ottawa scale to assess the quality of individual studies. In short, a maximum of 9  
35 points was assigned to each study: 4 for selection, 2 for comparability, and 3 for outcomes. A  
36 final score  $>5$  points was regarded as high quality. The quality of studies was good, ranging  
37 from 6 to 8 points.  
38  
39  
40  
41  
42  
43  
44  
45  
46  
47  
48  
49

50 We used Egger's ( $P = 0.41$ ) and Begg's ( $P = 1.00$ ) tests to test the publication bias, and there  
51 was no statistical evidence of publication bias among the studies. We performed a sensitivity  
52 analysis by changing the analysis model from a random-effects model to a fixed-effects  
53 model, and found that the results were unstable for different analysis models, giving different  
54  
55  
56  
57  
58  
59  
60

1  
2  
3  
4 results. When using the random-effects model, we found that gout or hyperuricemia did not  
5  
6 increase the risk of dementia, with a pooled hazard ratio of 0.94 (95% CI, 0.69, 1.28). Using  
7  
8 the fixed-effects model, we found that gout or hyperuricemia increased the risk of dementia,  
9  
10 with a pooled hazard ratio of 1.07 (95% CI, 1.04, 1.10). In consideration of the high  
11  
12 heterogeneity of the included articles, we preferred the results given by the random-effects  
13  
14 model.  
15  
16  
17

18  
19 In our meta-analysis, we found no increased risk of dementia among patients with gout or  
20  
21 hyperuricemia, with a pooled hazard ratio of 0.94 (95% CI, 0.69, 1.28), with an  $I^2$  of 98%,  $P$   
22  
23  $< 0.001$  (Figure 2). However, there was a decreased risk of AD in patients with gout or  
24  
25 hyperuricemia, with a pooled hazard ratio of 0.78 (95% CI, 0.64, 0.95), with an  $I^2$  of 55%,  $P$   
26  
27  $= 0.01$  (Figure 3).  
28  
29  
30  
31

32  
33 Lu et al. and Latourte et al. analyzed dementia patients in European, Singh et al. analyzed  
34  
35 patients in North America, and Hong et al. investigated data of Asian populations. Lu et al.  
36  
37 used AD diagnostic codes, which were positively predicted at 83% in a UK-based  
38  
39 GPRD-based validation study. Singh et al. and Hong et al. used ICD9-CM as the diagnostic  
40  
41 criterion for dementia. Latourte et al. used the DSM-IV criteria for the diagnosis of dementia  
42  
43 and NINCDS-ADRDA as the diagnostic standard for AD. We consider that the reasons for  
44  
45 the high degree of heterogeneity are related to the differences between races, diets, climate  
46  
47 factors, clinical characteristics between different countries, lack of standardized design,  
48  
49 inclusion criteria, and uniform follow-up time, which may affect the final results universality.  
50  
51  
52  
53  
54  
55  
56

## 57 **DISCUSSION**

58  
59 This meta-analysis was based on four articles of cohort studies performed in different  
60



1  
2  
3  
4 countries, thus providing a comprehensive evaluation of the association between dementia  
5  
6 and gout or hyperuricemia. The four cohort studies analyzed 121,136 cases of dementia, of  
7  
8 which Lu et al. included only patients with AD, while the other three analyzed data on all  
9  
10 types of dementia. In addition, of the four articles included in our meta-analysis, only one  
11  
12 described a lower risk of developing vascular dementia (VD) in patients with gout. All studies  
13  
14 were assessed as being of high quality based on the Newcastle–Ottawa Scale. The included  
15  
16 studies had adjustments for other risk factors. Our meta-analysis showed no statistically  
17  
18 significant risk of dementia in patients with gout or hyperuricemia compared with the  
19  
20 non-gout or non-hyperuricemia controls. In contrast, gout or hyperuricemia was negatively  
21  
22 correlated with the risk of AD.  
23  
24  
25  
26  
27  
28

29  
30 The existing reports hold different views on the pathophysiological mechanism of the  
31  
32 relationship between gout and dementia. Whether a high uric acid level predisposes to or  
33  
34 protects against dementia has not been uniformly summarized. Several studies have indicated  
35  
36 that inflammatory pathways may play an important role in increasing the risk of dementia.<sup>15 16</sup>  
37  
38 Hyperuricemia causes persistent low-grade systemic inflammation of gout and can also affect  
39  
40 the inflammatory capacity of immune cells.<sup>17</sup> However, there has been no unified conclusion  
41  
42 about the relationship between dementia and gout or hyperuricemia, which prompted our  
43  
44 meta-analysis.  
45  
46  
47  
48  
49

50 To date, it has been controversial whether gout or hyperuricemia and dementia are related.  
51  
52 There have been several speculations about the mechanism by which gout could affect the  
53  
54 onset of dementia. Some reports propose that gout or hyperuricemia may increase the risk of  
55  
56 dementia<sup>9,14</sup> because chronic inflammation from gout has some effects on the brain. Some  
57  
58  
59  
60

1  
2  
3  
4 studies have suggested that high inflammatory cytokine levels in brains with  
5  
6 neurodegeneration play important roles in the pathogenesis of dementia.<sup>18-20</sup> Others have  
7  
8 suggested that gout is associated with oxidative stress, which may play a key role in the  
9  
10 pathogenesis of dementia.<sup>21,22</sup> Elevated inflammatory cytokines can damage endothelial cells,  
11  
12 activate inflammatory cells, and cause oxidative stress, which promotes the progression of  
13  
14 atherosclerosis.<sup>19 23</sup> Atherosclerotic cardiovascular diseases are well-established risk factors  
15  
16 for dementia.<sup>24</sup> Additionally, there has been some evidence that an association of  
17  
18 hyperuricemia with cardiovascular disease is due to concomitant oxidative stress.<sup>25</sup> In  
19  
20 addition, Mollenhauer et al. compared 135 new-onset PD patients with 109 healthy people  
21  
22 and found that elevated uric acid levels could predict the cognitive decline in Parkinson's  
23  
24 disease.<sup>5</sup> Taken together, chronic inflammation and oxidative stress may be the final  
25  
26 pathways in dementia and gout or hyperuricemia, which may explain the high risk of  
27  
28 dementia reported by some studies in elderly people with gout or hyperuricemia.  
29  
30  
31  
32  
33  
34  
35  
36

37  
38 In contrast, some studies have confirmed that gout or hyperuricemia may decrease the risk of  
39  
40 dementia.<sup>8 10</sup> Uric acid has been proposed to have both a pro-oxidant effect<sup>26</sup> and an  
41  
42 anti-oxidant effect.<sup>27,28</sup> It can have some pro-oxidant effects in its oxidized state, but there is  
43  
44 relatively little evidence that this is an important mechanism for circulating uric acid, in  
45  
46 comparison to its antioxidant role. Uric acid is well established as an important circulating  
47  
48 antioxidant and free-radical scavenger. It is an antioxidant and metal chelator in vitro.<sup>29 30</sup> It  
49  
50 can effectively clear peroxynitrite and hydroxyl radicals<sup>27 31 32</sup> and reduce oxidative stress as  
51  
52 an antioxidant, may exert possible neuroprotective effects. Moreover, it has been reported that  
53  
54 the pathogenesis of AD is related to mitochondrial dysfunction. Some studies have shown that  
55  
56  
57  
58  
59  
60

1  
2  
3  
4 uric acid might preserve mitochondrial function and suppress oxyradical accumulation;<sup>27</sup>  
5  
6 thereby inhibiting the cytotoxic activity of lactoperoxidase<sup>33</sup> and repairing free  
7  
8 radical-induced DNA damage.<sup>34</sup> In our study, we analyzed the AD subgroup of dementia and  
9  
10 found that gout can reduce the risk of AD. This may also confirm the neuroprotective role of  
11  
12 uric acid.  
13  
14

15  
16 Our study found no correlation between dementia and gout or hyperuricemia. Dementia  
17  
18 involves variable clinical symptoms, multiple subtypes, and complex pathogenesis, which  
19  
20 may explain the contradictory results of studies on gout or hyperuricemia. More research is  
21  
22 needed to support this viewpoint. The risk of AD is inversely proportional to gout, and the  
23  
24 neuroprotective mechanism of uric acid may play a dominant role in the pathogenesis of AD.  
25  
26

27  
28 However, there were some potential limitations to our study. First, there were only four  
29  
30 studies in our meta-analysis, whose number of articles included were relatively small.  
31  
32

33  
34 Moreover, the cohort studies were mostly medical registry-based studies, which would raise  
35  
36 concerns over coding inaccuracy and misclassification. Second, although studies included had  
37  
38 been adjusted for other risk factors, the statistical heterogeneity is still high, which might be  
39  
40 attributed to differences in demographics, dietary factors, environmental factors, and clinical  
41  
42 characteristics in different countries, or lack of standardized design, inclusion criteria, and  
43  
44 follow-up time. Third, this was a pooled analysis of observational studies, which could only  
45  
46 demonstrate an association, but not causality. Therefore, we cannot determine the impact of  
47  
48 gout, hyperuricemia, or other unknown confounding factors on the outcome of dementia risk.  
49  
50

51  
52 Moreover, in the sensitivity analysis, we found that the results were unstable when using  
53  
54 different analysis models. Considering the high heterogeneity of the included articles, we  
55  
56  
57  
58  
59  
60

1  
2  
3  
4 preferred the results given by the random-effects model. Consequently, caution is needed  
5  
6 when interpreting the present meta-analysis findings.  
7

8  
9 In conclusion, our meta-analysis of cohort studies suggested that there is no risk of dementia  
10  
11 among patients with gout and hyperuricemia. However, high uric acid levels have a protective  
12  
13 effect on AD. More investigations are needed to demonstrate the potential relationship  
14  
15 between dementia and patients with gout and hyperuricemia.  
16  
17

18  
19  
20  
21  
22 **Contributors** Conceptualization: YL Methodology: S-YP and R-JC. Formal analysis: Z-JX;  
23  
24 data curation: Q-PZ. Writing original draft preparation: S-YP and R-JC. Writing review and  
25  
26 editing: YL. Approval of final manuscript: All authors  
27  
28

29  
30 **Funding:** The present work was supported by the National Key Research and Development  
31  
32 Program of China (Project no.2016YFC0906201) to YL, 1.3.5 project for disciplines of  
33  
34 excellence, West China Hospital, Sichuan University (Project no. ZYGD18015) to YL.  
35  
36

37 **Competing interests** None declared.  
38

39 **Patient and public involvement** No patient involved.  
40

41 **Provenance and peer review** Not commissioned; externally peer reviewed.  
42  
43

44 **Data sharing statement** No additional data are available.  
45  
46

## 47 REFERENCES

- 48 1. Gale SA, Acar D, Daffner KR. Dementia. *Am J Med* 2018;131:1161-69.
- 49 2. Prince M, Bryce R, Albanese E, *et al*. The global prevalence of dementia: a systematic review and  
50 metaanalysis. *Alzheim Dement* 2013;9:63-75.e2.
- 51 3. Li L, Zhang Y, Zeng C. Update on the epidemiology, genetics, and therapeutic options of  
52 hyperuricemia. *Am J Transl Res* 2020;12:3167-81.
- 53 4. Gupta MK, Singh JA. Cardiovascular disease in gout and the protective effect of treatments  
54 including urate-lowering therapy. *Drugs* 2019;79:531-41.
- 55 5. Mollenhauer B, Zimmermann J, Sixel-Doring F, *et al*. Baseline predictors for progression 4 years  
56 after Parkinson's disease diagnosis in the De Novo Parkinson Cohort (DeNoPa). *Mov Disord*  
57  
58  
59  
60

- 2019;34:67-77.
6. Lai SW, Lin CL, Liao KF. No association between gout and Alzheimer's disease: Results of a case-control study in older people in Taiwan. *Int J Geriatr Psych* 2013;28:1205-06.
  7. Engel B, Gomm W, Broich K, et al. Hyperuricemia and dementia—A case-control study. *BMC Neurol* 2018;18:131.
  8. Lu N, Dubreuil M, Zhang Y, et al. Gout and the risk of Alzheimer's disease: A population-based, BMI-matched cohort study. *Ann Rheum Dis*. 2016;75:547-51.
  9. Latourte A, Soumare A, Bardin T, et al. Uric acid and incident dementia over 12 years of follow-up: a population-based cohort study. *Ann Rheum Dis* 2018;77:328-35.
  10. Hong JY, Lan TY, Tang GJ, et al. Gout and the risk of dementia: A nationwide population-based cohort study. *Arthrit Res Ther* 2015;17:139.
  11. Schretlen DJ, Inscore AB, Jinnah HA, et al. Serum uric acid and cognitive function in community-dwelling older adults. *Neuropsychology* 2007;21:136-40.
  12. Higgins JP, Thompson SG. Quantifying heterogeneity in a meta-analysis. *Stat Med* 2002;21:1539-58.
  13. Higgins JP, Thompson SG, Deeks JJ, et al. Measuring inconsistency in meta-analyses. *BMJ* 2003;327:557-60.
  14. Singh JA, Cleveland JD. Gout and dementia in the elderly: a cohort study of Medicare claims. *BMC Geriatr* 2018;18:281.
  15. Wallin K, Solomon A, Kareholt I, et al. Midlife rheumatoid arthritis increases the risk of cognitive impairment two decades later: a population-based study. *J Alzheimer Dis* 2012;31:669-76.
  16. Dregan A, Chowienzyk P, Gulliford MC. Are inflammation and related therapy associated with all-cause dementia in a primary care population? *J Alzheimer Dis* 2015;46:1039-47.
  17. Cabau G, Crisan TO, Kluck V, et al. Urate-induced immune programming: Consequences for gouty arthritis and hyperuricemia. *Immunol Rev* 2020;294:92-105.
  18. Campbell IL, Stalder AK, Chiang CS, et al. Transgenic models to assess the pathogenic actions of cytokines in the central nervous system. *Mol Psych* 1997;2:125-9.
  19. Rafnsson SB, Deary IJ, Smith FB, et al. Cognitive decline and markers of inflammation and hemostasis: the Edinburgh Artery Study. *J Am Geriatr Soc* 2007;55:700-7.
  20. Schram MT, Euser SM, de Craen AJ, et al. Systemic markers of inflammation and cognitive decline in old age. *J Am Geriatr Soc* 2007;55:708-16.
  21. Pratico D, Uryu K, Leight S, et al. Increased lipid peroxidation precedes amyloid plaque formation in an animal model of Alzheimer amyloidosis. *J Neurosci* 2001;21:4183-7.
  22. Lin MT, Beal MF. Mitochondrial dysfunction and oxidative stress in neurodegenerative diseases. *Nature* 2006;443:787-95.
  23. Libby P. Inflammation in atherosclerosis. *Nature* 2002;420:868-74.
  24. Dufouil C, Seshadri S, Chene G. Cardiovascular risk profile in women and dementia. *J Alzheimer Dis* 2014;42 Suppl 4:S353-63.
  25. Coyle JT, Puttfarcken P. Oxidative stress, glutamate, and neurodegenerative disorders. *Science* 1993;262:689-95.
  26. Kanellis J, Kang DH. Uric acid as a mediator of endothelial dysfunction, inflammation, and vascular disease. *Semin Nephrol* 2005;25:39-42.
  27. Yu ZF, Bruce-Keller AJ, Goodman Y, et al. Uric acid protects neurons against excitotoxic and metabolic insults in cell culture, and against focal ischemic brain injury in vivo. *J Neurosci*

- 1  
2  
3 *Research* 1998;53:613-25.
- 4 28. Squadrito GL, Cueto R, Splenser AE, *et al.* Reaction of uric acid with peroxynitrite and implications  
5 for the mechanism of neuroprotection by uric acid. *Arch Biochem Biophys* 2000;376:333-7.
- 6 29. Ames BN, Cathcart R, Schwiers E, *et al.* Uric acid provides an antioxidant defense in humans  
7 against oxidant- and radical-caused aging and cancer: S hypothesis. *Proc Natl Acad Sci U S A*  
8 1981;78:6858-62.
- 9 30. Davies KJ, Sevanian A, Muakkassah-Kelly SF, *et al.* Uric acid-iron ion complexes. A new aspect of  
10 the antioxidant functions of uric acid. *Biochem J* 1986;235:747-54.
- 11 31. Hooper DC, Spitsin S, Kean RB, *et al.* Uric acid, a natural scavenger of peroxynitrite, in  
12 experimental allergic encephalomyelitis and multiple sclerosis. *Proc Natl Acad Sci U S A*  
13 1998;95:675-80.
- 14 32. Waring WS, Webb DJ, Maxwell SR. Systemic uric acid administration increases serum antioxidant  
15 capacity in healthy volunteers. *J Cardiovasc Pharmacol* 2001;38:365-71.
- 16 33. Everse J, Coates PW. The cytotoxic activity of lactoperoxidase: enhancement and inhibition by  
17 neuroactive compounds. *Free Radic Biol Med* 2004;37:839-49.
- 18 34. Anderson RF, Harris TA. Dopamine and uric acid act as antioxidants in the repair of DNA radicals:  
19 implications in Parkinson's disease. *Free radical Res* 2003;37:1131-6.
- 20  
21  
22  
23  
24  
25  
26  
27  
28  
29  
30  
31  
32  
33  
34  
35  
36  
37  
38  
39  
40  
41  
42  
43  
44  
45  
46  
47  
48  
49  
50  
51  
52  
53  
54  
55  
56  
57  
58  
59  
60

**Table 1** Characteristics of included studies in the meta-analysis.

|                                    | Lu N et al. [8]                                                                                                                    | Singh JA et al. [14]                                                                         | Hong JY et al. [10]                           | Latourte A et al. [9]                                                                                          |
|------------------------------------|------------------------------------------------------------------------------------------------------------------------------------|----------------------------------------------------------------------------------------------|-----------------------------------------------|----------------------------------------------------------------------------------------------------------------|
| Country                            | UK                                                                                                                                 | USA                                                                                          | Taiwan, China                                 | France                                                                                                         |
| Study design                       | Cohort study                                                                                                                       | Cohort study                                                                                 | Cohort study                                  | Cohort study                                                                                                   |
| Year                               | 2016                                                                                                                               | 2018                                                                                         | 2015                                          | 2018                                                                                                           |
| Age, mean years                    | 65                                                                                                                                 | 75.2                                                                                         | 63.5                                          | 72.9                                                                                                           |
| Male, %                            | 71                                                                                                                                 | 42.6                                                                                         | 63                                            | 38.7                                                                                                           |
| Diagnosis of gout or Hyperuricemia | diagnostic code using the Read classification                                                                                      | (ICD-9-CM) codes                                                                             | (ICD9-CM) codes                               | Hyperuricemia: $\geq 360$ $\mu\text{mol} / \text{L}$ for men, $\geq 300$ $\mu\text{mol} / \text{L}$ for women. |
| Diagnosis of dementia              | AD diagnostic codes                                                                                                                | (ICD-9-CM) codes                                                                             | (ICD9-CM) codes                               | DSM-IV<br>NINCDS-ADRDA                                                                                         |
| Subtype of dementia                | AD                                                                                                                                 | All subtypes of dementia                                                                     | All subtypes of dementia<br>AD, VD            | All subtypes of dementia<br>AD                                                                                 |
| Number of dementia with controls   | 309/238805                                                                                                                         | 106346/1416173                                                                               | 5905/114742<br>AD:102/114742<br>VD:210/114742 | 78/1192<br>AD:55/1192                                                                                          |
| Number of dementia with cases      | 1942/59224                                                                                                                         | 5310/296648                                                                                  | 1214/28769<br>AD:542/28769<br>VD:991/28769    | 32/406<br>AD:21/406                                                                                            |
| Adjusted confounders               | Age, gender, entry-time, BMI, smoking, alcohol use, physician visits, social deprivation index, comorbidities, and medication use. | Age, gender, race, medical comorbidities, common medications for cardiac diseases, and gout. | Age, gender, relevant comorbidities.          | Age, gender, tobacco and alcohol consumption, cholesterol, medical comorbidities, medication use               |

|                                        |          |           |          |          |
|----------------------------------------|----------|-----------|----------|----------|
| Follow-up years<br>(mean or mean ± SD) | 5        | 2.3 (1.7) | 4.3(2.1) | 12       |
| Quality grading                        | 7 points | 6 points  | 7 points | 8 pionts |

(AD: Alzheimer's disease; VD: Vascular dementia; DSM-IV: Diagnostic and Statistical Manual of Mental disorders Version IV; NINCDS-ADRDA: the National Institute of Neurological and Communicative Disorders and Stroke–Alzheimer’s Disease and Related Disorders Association; ICD9-CM: International Classification of Diseases Ninth Revision, Clinical Modification codes; BMI: body mass index)

For peer review only

1  
2  
3  
4  
5  
6  
7  
8  
9  
10  
11  
12  
13  
14  
15  
16  
17  
18  
19  
20  
21  
22  
23  
24  
25  
26  
27  
28  
29  
30  
31  
32  
33  
34  
35  
36  
37  
38  
39  
40  
41  
42  
43  
44  
45  
46



1  
2  
3  
4  
5  
6  
7  
8  
9  
10  
11  
12  
13  
14  
15  
16  
17  
18  
19  
20  
21  
22  
23  
24  
25  
26  
27  
28  
29  
30  
31  
32  
33  
34  
35  
36  
37  
38  
39  
40  
41  
42  
43  
44  
45  
46  
47  
48  
49  
50  
51  
52  
53  
54  
55  
56  
57  
58  
59  
60

For peer review only

Figure 1 Flow diagram showing the identification and selection of cohort studies included in the review.

Figure 1

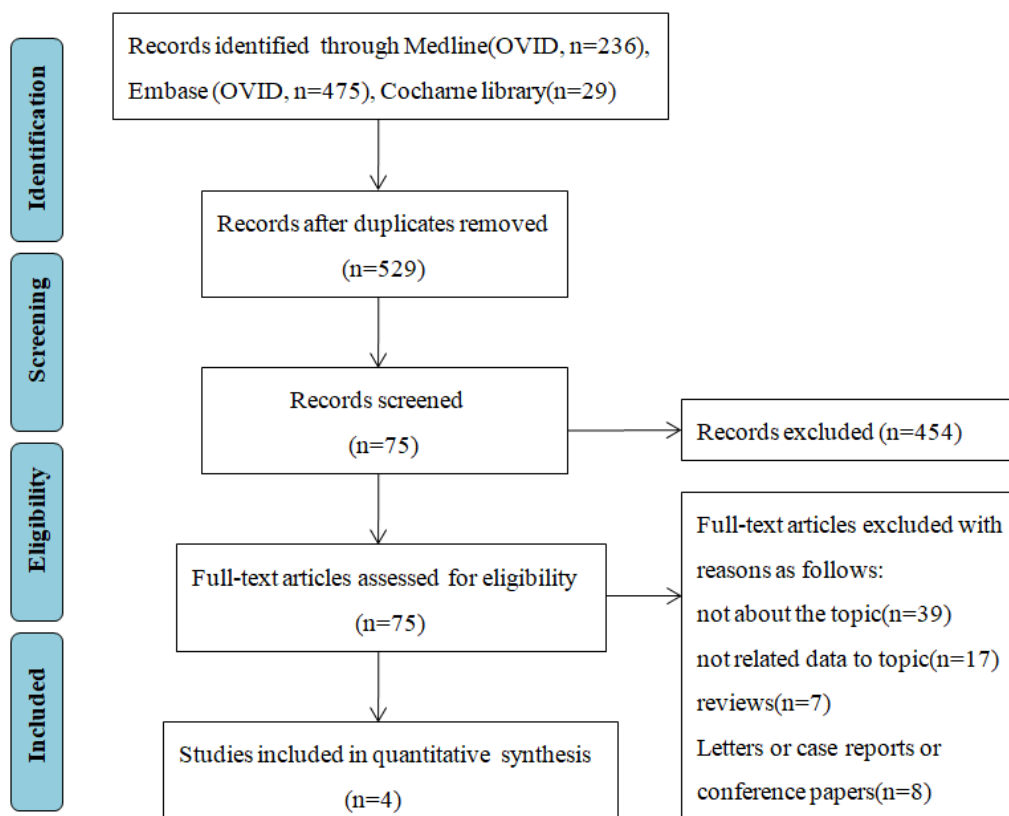

Figure 2 Forest plot showing an association between dementia and patient's with gout and hyperuricemia.

Figure 2

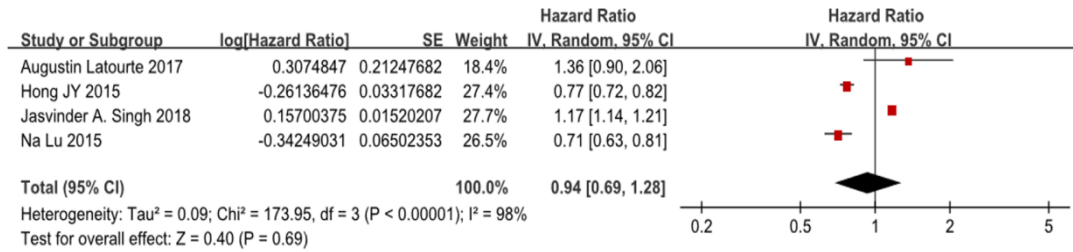

For peer review only

Figure 3 Forest plot showing an association between AD and patient's with gout and hyperuricemia.

Figure 3

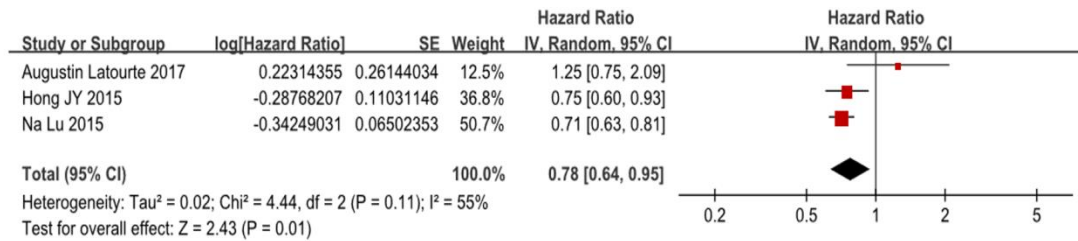

1  
2  
3  
4 Appendix 1  
5

6 Medline Ovid Search Strategy  
7

- 8  
9 1. exp Dementia/  
10  
11 2. Delirium/  
12  
13 3. Wernicke Encephalopathy/  
14  
15 4. Delirium, Dementia, Amnestic, Cogni-tive Disorders/  
16  
17 5. dement\*.mp.  
18  
19 6. alzheimer\*.mp.  
20  
21 7. (lewy\* adj2 bod\*).mp.  
22  
23 8. deliri\*.mp.  
24  
25 9. (chronic adj2 cerebrovascular).mp.  
26  
27 10. (organic brain disease or organicbrain syndrome).mp  
28  
29 11. (normal pressure hydrocephalus andshunt\*).mp.  
30  
31 12. benign senescent forgetfulness.mp.  
32  
33 13. (cerebr\* adj2 deteriorat\*).mp.  
34  
35 14. (cerebral\* adj2 insufficient\*).mp.  
36  
37 15. (pick\* adj2 disease).mp.  
38  
39 16. (creutzfeldt or jcd or cjd).mp.  
40  
41 17. huntington\*.mp.  
42  
43 18. binswanger\*.mp.  
44  
45 19. korsako\*.mp.  
46  
47  
48  
49  
50  
51  
52  
53  
54  
55  
56  
57  
58 20.1-19/OR  
59  
60

1  
2  
3  
4 21.exp gout/  
5

6 22.gout.mp.  
7

8  
9 23. exp hyperuricemia /  
10

11 24. uric acid.mp.  
12

13  
14 25.20-23/OR  
15

16  
17 26. 20 and 25  
18  
19

20  
21  
22 Appendix 2  
23

24  
25 Embase search strategy  
26

27 1.exp gout/  
28

29 2.gout.mp.  
30

31 3. exp hyperuricemia /  
32

33 4. uric acid.mp.  
34

35 5.1-4/OR  
36

37 6. exp \*dementia/  
38

39 7. dement\*.ti,ab.  
40

41 8. alzheimer\*.ti,ab.  
42

43 9. (lewy\* adj2 bod\*).ti,ab.  
44

45 10. (frontotemporal\* or FTD or FTLD).ti,ab.  
46

47 11.6-10/or  
48

49 12. 5 and 11  
50  
51  
52  
53  
54  
55  
56  
57  
58  
59  
60

1  
2  
3  
4 Appendix 3  
5

6 Cochrane librarysearch strategy  
7

8  
9 1.exp gout/  
10

11 2.gout.mp.  
12

13 3. exp hyperuricemia /  
14

15 4. uric acid.mp.  
16

17 5.1-4/OR  
18

19 6. exp \*dementia/  
20

21 7. dement\*.ti,ab.  
22

23 8. alzheimer\*.ti,ab.  
24

25 9. (lewy\* adj2 bod\*).ti,ab.  
26

27 10. (frontotemporal\* or FTD or FTLD).ti,ab.  
28

29 11.6-10/or  
30

31 12. 5 and 11  
32  
33  
34  
35  
36  
37  
38  
39  
40  
41  
42  
43  
44  
45  
46  
47  
48  
49  
50  
51  
52  
53  
54  
55  
56  
57  
58  
59  
60

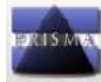

# PRISMA 2009 Checklist

| Section/topic                      | #  | Checklist item                                                                                                                                                                                                                                                                                              | Reported on page # |
|------------------------------------|----|-------------------------------------------------------------------------------------------------------------------------------------------------------------------------------------------------------------------------------------------------------------------------------------------------------------|--------------------|
| <b>TITLE</b>                       |    |                                                                                                                                                                                                                                                                                                             |                    |
| Title                              | 1  | Identify the report as a systematic review, meta-analysis, or both.                                                                                                                                                                                                                                         | P1                 |
| <b>ABSTRACT</b>                    |    |                                                                                                                                                                                                                                                                                                             |                    |
| Structured summary                 | 2  | Provide a structured summary including, as applicable: background; objectives; data sources; study eligibility criteria, participants, and interventions; study appraisal and synthesis methods; results; limitations; conclusions and implications of key findings; systematic review registration number. | P1-2               |
| <b>INTRODUCTION</b>                |    |                                                                                                                                                                                                                                                                                                             |                    |
| Rationale                          | 3  | Describe the rationale for the review in the context of what is already known.                                                                                                                                                                                                                              | P3                 |
| Objectives                         | 4  | Provide an explicit statement of questions being addressed with reference to participants, interventions, comparisons, outcomes, and study design (PICOS).                                                                                                                                                  | P3                 |
| <b>METHODS</b>                     |    |                                                                                                                                                                                                                                                                                                             |                    |
| Protocol and registration          | 5  | Indicate if a review protocol exists, if and where it can be accessed (e.g., Web address), and, if available, provide registration information including registration number.                                                                                                                               | none               |
| Eligibility criteria               | 6  | Specify study characteristics (e.g., PICOS, length of follow-up) and report characteristics (e.g., years considered, language, publication status) used as criteria for eligibility, giving rationale.                                                                                                      | P4-5               |
| Information sources                | 7  | Describe all information sources (e.g., databases with dates of coverage, contact with study authors to identify additional studies) in the search and date last searched.                                                                                                                                  | P4                 |
| Search                             | 8  | Present full electronic search strategy for at least one database, including any limits used, such that it could be repeated.                                                                                                                                                                               | P4                 |
| Study selection                    | 9  | State the process for selecting studies (i.e., screening, eligibility, included in systematic review, and, if applicable, included in the meta-analysis).                                                                                                                                                   | P4                 |
| Data collection process            | 10 | Describe method of data extraction from reports (e.g., piloted forms, independently, in duplicate) and any processes for obtaining and confirming data from investigators.                                                                                                                                  | P4                 |
| Data items                         | 11 | List and define all variables for which data were sought (e.g., PICOS, funding sources) and any assumptions and simplifications made.                                                                                                                                                                       | P4                 |
| Risk of bias in individual studies | 12 | Describe methods used for assessing risk of bias of individual studies (including specification of whether this was done at the study or outcome level), and how this information is to be used in any data synthesis.                                                                                      | P4                 |
| Summary measures                   | 13 | State the principal summary measures (e.g., risk ratio, difference in means).                                                                                                                                                                                                                               | P4                 |
| Synthesis of results               | 14 | Describe the methods of handling data and combining results of studies, if done, including measures of consistency (e.g., I <sup>2</sup> ) for each meta-analysis.                                                                                                                                          | P5                 |



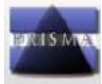

# PRISMA 2009 Checklist

Page 1 of 2

| Section/topic                 | #  | Checklist item                                                                                                                                                                                           | Reported on page # |
|-------------------------------|----|----------------------------------------------------------------------------------------------------------------------------------------------------------------------------------------------------------|--------------------|
| Risk of bias across studies   | 15 | Specify any assessment of risk of bias that may affect the cumulative evidence (e.g., publication bias, selective reporting within studies).                                                             | P5                 |
| Additional analyses           | 16 | Describe methods of additional analyses (e.g., sensitivity or subgroup analyses, meta-regression), if done, indicating which were pre-specified.                                                         | none               |
| <b>RESULTS</b>                |    |                                                                                                                                                                                                          |                    |
| Study selection               | 17 | Give numbers of studies screened, assessed for eligibility, and included in the review, with reasons for exclusions at each stage, ideally with a flow diagram.                                          | P6                 |
| Study characteristics         | 18 | For each study, present characteristics for which data were extracted (e.g., study size, PICOS, follow-up period) and provide the citations.                                                             | P6                 |
| Risk of bias within studies   | 19 | Present data on risk of bias of each study and, if available, any outcome level assessment (see item 12).                                                                                                | P6                 |
| Results of individual studies | 20 | For all outcomes considered (benefits or harms), present, for each study: (a) simple summary data for each intervention group (b) effect estimates and confidence intervals, ideally with a forest plot. | P6                 |
| Synthesis of results          | 21 | Present results of each meta-analysis done, including confidence intervals and measures of consistency.                                                                                                  | P6-7               |
| Risk of bias across studies   | 22 | Present results of any assessment of risk of bias across studies (see Item 15).                                                                                                                          | P6-7               |
| Additional analysis           | 23 | Give results of additional analyses, if done (e.g., sensitivity or subgroup analyses, meta-regression [see Item 16]).                                                                                    | none               |
| <b>DISCUSSION</b>             |    |                                                                                                                                                                                                          |                    |
| Summary of evidence           | 24 | Summarize the main findings including the strength of evidence for each main outcome; consider their relevance to key groups (e.g., healthcare providers, users, and policy makers).                     | P7-9               |
| Limitations                   | 25 | Discuss limitations at study and outcome level (e.g., risk of bias), and at review-level (e.g., incomplete retrieval of identified research, reporting bias).                                            | P9-10              |
| Conclusions                   | 26 | Provide a general interpretation of the results in the context of other evidence, and implications for future research.                                                                                  | P10                |
| <b>FUNDING</b>                |    |                                                                                                                                                                                                          |                    |
| Funding                       | 27 | Describe sources of funding for the systematic review and other support (e.g., supply of data); role of funders for the systematic review.                                                               | P10                |

From: Moher D, Liberati A, Tetzlaff J, Altman DG, The PRISMA Group (2009). Preferred Reporting Items for Systematic Reviews and Meta-Analyses: The PRISMA Statement. PLoS Med 6(6): e1000097. doi:10.1371/journal.pmed1000097

For more information, visit: [www.prisma-statement.org](http://www.prisma-statement.org).

Page 2 of 2

For peer review only - <http://bmjopen.bmj.com/site/about/guidelines.xhtml>

# BMJ Open

## The risk of dementia in gout and hyperuricemia: A meta-analysis of cohort studies

|                                 |                                                                                                                                                                                                                                                                                                                                                                                                                                                                 |
|---------------------------------|-----------------------------------------------------------------------------------------------------------------------------------------------------------------------------------------------------------------------------------------------------------------------------------------------------------------------------------------------------------------------------------------------------------------------------------------------------------------|
| Journal:                        | <i>BMJ Open</i>                                                                                                                                                                                                                                                                                                                                                                                                                                                 |
| Manuscript ID                   | bmjopen-2020-041680.R2                                                                                                                                                                                                                                                                                                                                                                                                                                          |
| Article Type:                   | Original research                                                                                                                                                                                                                                                                                                                                                                                                                                               |
| Date Submitted by the Author:   | 08-Feb-2021                                                                                                                                                                                                                                                                                                                                                                                                                                                     |
| Complete List of Authors:       | pan, shu-yue; Sichuan University West China Hospital, Cheng, Rui-Juan; Sichuan University West China Hospital, Department of Rheumatology and Immunology<br>Xia, Zi-jing; Sichuan University West China Hospital, Department of Rheumatology and Immunology<br>Zhang, Qiu-Ping; Sichuan University West China Hospital, Department of Rheumatology and Immunology<br>Liu, Yi; Sichuan University West China Hospital, Department of Rheumatology and Immunology |
| <b>Primary Subject Heading</b>: | Neurology                                                                                                                                                                                                                                                                                                                                                                                                                                                       |
| Secondary Subject Heading:      | Rheumatology                                                                                                                                                                                                                                                                                                                                                                                                                                                    |
| Keywords:                       | INTERNAL MEDICINE, Dementia < NEUROLOGY, Stroke < NEUROLOGY, Neurology < INTERNAL MEDICINE, Rheumatology < INTERNAL MEDICINE                                                                                                                                                                                                                                                                                                                                    |
|                                 |                                                                                                                                                                                                                                                                                                                                                                                                                                                                 |

SCHOLARONE™  
Manuscripts



I, the Submitting Author has the right to grant and does grant on behalf of all authors of the Work (as defined in the below author licence), an exclusive licence and/or a non-exclusive licence for contributions from authors who are: i) UK Crown employees; ii) where BMJ has agreed a CC-BY licence shall apply, and/or iii) in accordance with the terms applicable for US Federal Government officers or employees acting as part of their official duties; on a worldwide, perpetual, irrevocable, royalty-free basis to BMJ Publishing Group Ltd ("BMJ") its licensees and where the relevant Journal is co-owned by BMJ to the co-owners of the Journal, to publish the Work in this journal and any other BMJ products and to exploit all rights, as set out in our [licence](#).

The Submitting Author accepts and understands that any supply made under these terms is made by BMJ to the Submitting Author unless you are acting as an employee on behalf of your employer or a postgraduate student of an affiliated institution which is paying any applicable article publishing charge ("APC") for Open Access articles. Where the Submitting Author wishes to make the Work available on an Open Access basis (and intends to pay the relevant APC), the terms of reuse of such Open Access shall be governed by a Creative Commons licence – details of these licences and which [Creative Commons](#) licence will apply to this Work are set out in our licence referred to above.

Other than as permitted in any relevant BMJ Author's Self Archiving Policies, I confirm this Work has not been accepted for publication elsewhere, is not being considered for publication elsewhere and does not duplicate material already published. I confirm all authors consent to publication of this Work and authorise the granting of this licence.

## The risk of dementia in gout and hyperuricemia: A meta-analysis of cohort studies

Shu-Yue Pan<sup>1,2,+</sup>, Rui-Juan Cheng<sup>1,+</sup>, Zi-Jing Xia<sup>1</sup>, Qiu-Ping Zhang<sup>1</sup>, Yi Liu<sup>1,\*</sup>

<sup>1</sup>Department of Rheumatology and Immunology, Sichuan University West China Hospital, Chengdu, China.

<sup>2</sup>Department of Rheumatology and Immunology, Chengdu Fifth People's Hospital, Chengdu, Sichuan, China.

\*Corresponding author: Yi Liu

Department of Rheumatology and Immunology, Sichuan University West China Hospital  
Chengdu, Sichuan, CN.

Tel:18980602061

E-mail address: [yi2006liu@163.com](mailto:yi2006liu@163.com)

<sup>+</sup>Shu-Yue Pan and Rui-Juan Cheng are co-first authors.

Word count: 4211 words

### Abstract

**Objectives:** Gout, characterized by hyperuricemia with monosodium urate crystal formation and inflammation, is the most common inflammatory arthritis in adults. Recent studies have found that elevated uric acid levels are related to the occurrence of dementia. We conducted a

1  
2  
3  
4 study to investigate the association between dementia and gout or hyperuricemia.  
5  
6

7 **Design:** Systematic review and meta-analysis of cohort studies  
8

9 **Data sources:** Studies were screened from inception to June 28, 2019, by searching Medline,  
10  
11  
12  
13  
14  
15  
16  
17  
18  
19  
20  
21  
22  
23  
24  
25  
26  
27  
28  
29  
30  
31  
32  
33  
34  
35  
36  
37  
38  
39  
40  
41  
42  
43  
44  
45  
46  
47  
48  
49  
50  
51  
52  
53  
54  
55  
56  
57  
58  
59  
60  
EMBASE, and the Cochrane library databases.

**Eligibility criteria:** Cohort studies comparing the risk of dementia in patients with gout and hyperuricemia versus non-gout and non-hyperuricemia controls were enrolled.

**Data extraction and analysis:** Two reviewers separately selected studies and extracted data using the Medical Subject Headings without restriction on languages or countries. The adjusted hazard ratios (HRs) were pooled using the DerSimonian and Laird random-effects model. Sensitivity analyses were conducted to evaluate the stability of the results. Publication bias was evaluated using Egger's and Begg's tests. Quality assessment was performed according to the Newcastle–Ottawa scale.

**Results:** Four cohort studies that met the inclusion criteria were included in our meta-analysis. We found that gout and hyperuricemia did not increase the risk of dementia, with a pooled HR of 0.94 (95% CI, 0.69, 1.28), but might decrease the risk of Alzheimer's disease (AD), with a pooled hazard ratio of 0.78 (95% CI, 0.64, 0.95). There was little evidence of publication bias. Quality assessment of the included studies was high (range, 6–8 points).

**Conclusions:** Our study shows that gout and hyperuricemia do not increase the risk of dementia. However, gout and hyperuricemia might have a protective effect against AD. Due to the limited number of research articles, more investigations are needed to demonstrate the potential relationship between dementia and gout or hyperuricemia.

1  
2  
3  
4 **Keywords:** Alzheimer's disease; dementia; gout; hyperuricemia; meta-analysis  
5

6 **Strengths and limitations of this study:**  
7

- 8
- 9 ● We conducted a meta-analysis of cohort studies to compare the risk of dementia in  
10 patients with gout and hyperuricemia.  
11
  - 12 ● As there are few meta-analyses of cohort studies on dementia and gout, our research  
13 provides a basis for future research.  
14
  - 15 ● The results of our meta-analysis should be interpreted with caution due to the small  
16 number and high heterogeneity of the included studies.  
17
  - 18 ● Differences in countries, environmental factors, and clinical features, and lack of  
19 uniformity in study designs, inclusion criteria, and follow-up durations were the main  
20 sources of heterogeneity in our study.  
21  
22  
23  
24  
25  
26  
27  
28  
29  
30  
31  
32  
33  
34

35 **INTRODUCTION**  
36

37 With the aging of the population and the improvement in living standards, the incidence of  
38 ageing-related cerebrovascular diseases and metabolic diseases is increasing. Dementia is a  
39 common age-dependent disorder characterized by progressive deterioration of cognitive  
40 ability and function, which can be caused by primary neurologic, neuropsychiatric, and other  
41 conditions, such as traumatic brain injury and tumors. Most senile dementias are caused by  
42 neurodegeneration. Common diseases include Alzheimer's disease, vascular dementia, Lewy  
43 body dementia, frontotemporal degeneration, and Parkinson's disease.<sup>1</sup> Notably, the number  
44 of patients with dementia worldwide is expected to increase to 115 million by 2050.<sup>2</sup>  
45  
46  
47  
48  
49  
50  
51  
52  
53  
54  
55  
56  
57  
58  
59  
60

1  
2  
3  
4 Therefore, it is essential to study the pathogenesis of dementia to improve prevention and  
5  
6 treatment of this condition.  
7

8  
9 With changes in diet and increases in obesity, the incidence of hyperuricemia also continues  
10  
11 to rise. Hyperuricemia is caused by increased production of uric acid in and/or decreased  
12  
13 excretion of uric acid from the body.<sup>3</sup> Hyperuricemia may not cause obvious clinical  
14  
15 symptoms for a long time, but with a persistent increase in blood uric acid levels, urate  
16  
17 deposition may occur, which can damage tissues and internal organs. In fact, hyperuricemia  
18  
19 not only causes gout, but is also an independent risk factor for cardiovascular disease and  
20  
21 chronic kidney disease.<sup>4</sup> Gout is the most common inflammatory arthritis in adults. Common  
22  
23 hallmarks of gout include hyperuricemia, monosodiumurate crystal formation, and gouty  
24  
25 arthritis.  
26  
27

28  
29 Moreover, several epidemiological studies have reported an association between chronic  
30  
31 inflammation and dementia. In recent years, blood uric acid levels have been considered to be  
32  
33 closely related to neurodegenerative changes in Parkinson's disease and Alzheimer's disease  
34  
35 (AD).<sup>5</sup> Many studies have evaluated the relationship between uric acid and cognitive  
36  
37 impairment disorders.<sup>6-10</sup> The findings of Lu et al.<sup>8</sup> supported the potential neuroprotective  
38  
39 function of uric acid. In contrast, Schretlen et al.<sup>11</sup> found that elevated blood uric acid levels  
40  
41 increased the risk of cognitive impairment. Thus, whether uric acid predisposes to or protects  
42  
43 against dementia remains unclear.  
44  
45  
46  
47  
48  
49  
50  
51

52  
53 Thus, we here performed a systematic review and meta-analysis of the data reported by  
54  
55 cohort studies on the association between dementia and gout or hyperuricemia.  
56  
57  
58  
59  
60

## METHODS

A comprehensive literature search was conducted to identify all relevant articles in the Medline (Ovid), Embase (Ovid), and Cochrane Library databases, from their respective inception dates until June 28, 2019. Two independent reviewers searched the databases systemically and extensively to obtain studies about the association between dementia and gout or hyperuricemia, without any language or country restrictions. The Medical Subject Heading (MeSH) terms “gout”, “hyperuricemia,” and “dementia” were used in the search strategy.(See supplementary files 1)

Data abstraction was performed by two independent reviewers using a unified form. From each primary study, we extracted the following information: the first author’s last name, year of publication, country where the study was performed, sample size, mean age, proportion of men, diagnostic criteria, subtype of dementia, average duration of follow-up years, adjusted covariates, quality of assessment, and adjusted hazard ratio (HR) and 95% confidence interval (CI).

The quality of the studies was scored according to the Newcastle-Ottawa scale, where a higher score ( $\geq 5$  points) represents better quality. Three major components were scored: selection (0–4 points), comparability (0–2 points), and outcome (0–3 points).

### **Inclusion and exclusion criteria**

Two investigators read the title and abstracts of all identified papers and evaluated the literature eligibility independently. Then, we obtained full reports from the articles that appeared eligible, and two investigators again independently assessed whether the papers met



1  
2  
3  
4 the following inclusion criteria: (1) cohort study; (2) original, peer-reviewed study; (3) risk  
5  
6 estimates of dementia morbidity in gout or hyperuricemia patients compared with non-gout or  
7  
8 non-hyperuricemia controls, with dementia occurring after gout or hyperuricemia; (4)  
9  
10 adjusted hazard ratio (HR) can be extracted or calculated; and (5) clearly stated dementia (any  
11  
12 type, including vascular dementia and AD), gout, and hyperuricemia diagnostic criteria; and  
13  
14  
15 (6) if multiple studies were reported from the same center and using the same patient  
16  
17 population, we selected the study with the largest sample size or with the most comprehensive  
18  
19 data for the meta-analysis. The following reports were excluded: (1) conference articles,  
20  
21 review articles, editorials, commentaries, hypothesis papers, case reports, and letters; (2)  
22  
23 multiple publications from the same population; (3) studies without a control group; (4)  
24  
25 studies without clear definition of hyperuricemia, gout, or dementia; (5) studies with dementia  
26  
27 occurring before the onset of gout or hyperuricemia.  
28  
29  
30  
31  
32  
33  
34  
35  
36  
37

### 38 **Statistical analysis**

39  
40 Review Manager 5.3 software was used to calculate the pooled effect size estimate. The  
41  
42 adjusted hazard ratios (HRs) were pooled using the DerSimonian and Laird random-effects  
43  
44 model, and the weights were equal to the inverse variance of each study's effect estimation.  
45  
46 Forest plots were produced for visual assessment of the HRs and corresponding 95% CIs  
47  
48 across studies. Heterogeneity of HRs across studies was evaluated using the Cochrane Q  
49  
50 statistic and the  $I^2$  statistic (values of 25%, 50%, and 75% were considered to represent low,  
51  
52 medium, and high heterogeneity, respectively).<sup>12 13</sup> Sensitivity analysis was conducted to  
53  
54 evaluate the stability of the results. Publication bias was evaluated using Egger's and Begg's  
55  
56  
57  
58  
59  
60

1  
2  
3  
4 tests.  
5  
6  
7  
8

## 9 **RESULTS**

10 A flow diagram of the selection process is presented in Figure 1. A total of 740 potentially  
11 relevant articles were identified by keyword search from the electronic databases. After the  
12 initial screening based on titles and abstracts, 665 articles were excluded. Full-text evaluation  
13 was conducted in the remaining 75 articles, and 71 articles were excluded due to irrelevant  
14 topics or because of being case-control, review, or meta-analysis reports, or because of not  
15 fulfilling our inclusion criteria. Ultimately, four cohort studies were selected for the  
16 meta-analysis.<sup>8-10 14</sup>

17 The characteristics of the included studies are shown in Table 1. All four studies included  
18 both men and women, and the average age of participants was  $\geq 60$  years. These studies were  
19 conducted primarily in the UK, USA, Taiwan, China, and France. The study samples ranged  
20 from 406 to 1,712,821, and the follow-up durations ranged from 2.3 to 12 years. We used the  
21 Newcastle-Ottawa scale to assess the quality of individual studies. In short, a maximum of 9  
22 points was assigned to each study: 4 for selection, 2 for comparability, and 3 for outcomes. A  
23 final score  $>5$  points was regarded as high quality. The quality of studies was good, ranging  
24 from 6 to 8 points.

25 We used Egger's ( $P = 0.41$ ) and Begg's ( $P = 1.00$ ) tests to test the publication bias, and there  
26 was no statistical evidence of publication bias among the studies. We performed a sensitivity  
27 analysis by changing the analysis model from a random-effects model to a fixed-effects  
28 model, and found that the results were unstable for different analysis models, giving different  
29  
30  
31  
32  
33  
34  
35  
36  
37  
38  
39  
40  
41  
42  
43  
44  
45  
46  
47  
48  
49  
50  
51  
52  
53  
54  
55  
56  
57  
58  
59  
60

1  
2  
3  
4 results. When using the random-effects model, we found that gout or hyperuricemia did not  
5  
6 increase the risk of dementia, with a pooled hazard ratio of 0.94 (95% CI, 0.69, 1.28). Using  
7  
8 the fixed-effects model, we found that gout or hyperuricemia increased the risk of dementia,  
9  
10 with a pooled hazard ratio of 1.07 (95% CI, 1.04, 1.10). In consideration of the high  
11  
12 heterogeneity of the included articles, we preferred the results given by the random-effects  
13  
14 model.  
15  
16  
17

18  
19 In our meta-analysis, we found no increased risk of dementia among patients with gout or  
20  
21 hyperuricemia, with a pooled hazard ratio of 0.94 (95% CI, 0.69, 1.28), with an  $I^2$  of 98%,  $P$   
22  
23  $< 0.001$  (Figure 2). However, there was a decreased risk of AD in patients with gout or  
24  
25 hyperuricemia, with a pooled hazard ratio of 0.78 (95% CI, 0.64, 0.95), with an  $I^2$  of 55%,  $P$   
26  
27  $= 0.01$  (Figure 3).  
28  
29  
30  
31

32  
33 Lu et al. and Latourte et al. analyzed dementia patients in European, Singh et al. analyzed  
34  
35 patients in North America, and Hong et al. investigated data of Asian populations. Lu et al.  
36  
37 used AD diagnostic codes, which were positively predicted at 83% in a UK-based  
38  
39 GPRD-based validation study. Singh et al. and Hong et al. used ICD9-CM as the diagnostic  
40  
41 criterion for dementia. Latourte et al. used the DSM-IV criteria for the diagnosis of dementia  
42  
43 and NINCDS-ADRDA as the diagnostic standard for AD. We consider that the reasons for  
44  
45 the high degree of heterogeneity are related to the differences between races, diets, climate  
46  
47 factors, clinical characteristics between different countries, lack of standardized design,  
48  
49 inclusion criteria, and uniform follow-up time, which may affect the final results universality.  
50  
51  
52  
53  
54  
55  
56

## 57 **DISCUSSION**

58  
59 This meta-analysis was based on four articles of cohort studies performed in different  
60

1  
2  
3  
4 countries, thus providing a comprehensive evaluation of the association between dementia  
5  
6 and gout or hyperuricemia. The four cohort studies analyzed 121,136 cases of dementia, of  
7  
8 which Lu et al. included only patients with AD, while the other three analyzed data on all  
9  
10 types of dementia. In addition, of the four articles included in our meta-analysis, only one  
11  
12 described a lower risk of developing vascular dementia (VD) in patients with gout.<sup>10</sup> All  
13  
14 studies were assessed as being of high quality based on the Newcastle–Ottawa Scale. The  
15  
16 included studies had adjustments for other risk factors. Our meta-analysis showed no  
17  
18 statistically significant risk of dementia in patients with gout or hyperuricemia compared with  
19  
20 the non-gout or non-hyperuricemia controls. In contrast, gout or hyperuricemia was  
21  
22 negatively correlated with the risk of AD. The existing reports hold different views on the  
23  
24 pathophysiological mechanism of the relationship between gout and dementia. Whether a  
25  
26 high uric acid level predisposes to or protects against dementia has not been uniformly  
27  
28 summarized. Several studies have indicated that inflammatory pathways may play an  
29  
30 important role in increasing the risk of dementia.<sup>15 16</sup> Hyperuricemia causes persistent  
31  
32 systemic inflammation of gout and can also affect the inflammatory capacity of immune  
33  
34 cells.<sup>17</sup> However, there has been no unified conclusion about the relationship between  
35  
36 dementia and gout or hyperuricemia, which prompted our meta-analysis.

37  
38  
39  
40  
41  
42  
43  
44  
45  
46  
47  
48 To date, it has been controversial whether gout or hyperuricemia and dementia are related.  
49  
50  
51  
52  
53  
54  
55  
56  
57  
58  
59  
60  
There have been several speculations about the mechanism by which gout could affect the  
onset of dementia. Some reports propose that gout or hyperuricemia may increase the risk of  
dementia<sup>9 14</sup> because chronic inflammation from gout has some effects on the brain. Some  
studies have suggested that high inflammatory cytokine levels in brains with

1  
2  
3  
4 neurodegeneration play important roles in the pathogenesis of dementia.<sup>18-20</sup> Others have  
5  
6 suggested that gout is associated with oxidative stress, which may play a key role in the  
7  
8 pathogenesis of dementia.<sup>21 22</sup> Elevated inflammatory cytokines can damage endothelial cells,  
9  
10 activate inflammatory cells, and cause oxidative stress, which promotes the progression of  
11  
12 atherosclerosis.<sup>19 23</sup> Atherosclerotic cardiovascular diseases are well-established risk factors  
13  
14 for dementia.<sup>24</sup> Additionally, there has been some evidence that an association of  
15  
16 hyperuricemia with cardiovascular disease is due to concomitant oxidative stress.<sup>25</sup> Taken  
17  
18 together, chronic inflammation and oxidative stress may be the final pathways in dementia  
19  
20 and gout or hyperuricemia, which may explain the high risk of dementia reported by some  
21  
22 studies in elderly people with gout or hyperuricemia.  
23  
24  
25  
26  
27  
28

29  
30 In contrast, some studies have confirmed that gout or hyperuricemia may decrease the risk of  
31  
32 dementia.<sup>8 10</sup> Uric acid has been proposed to have both a pro-oxidant effect<sup>26</sup> and an  
33  
34 anti-oxidant effect.<sup>27 28</sup> It can have some pro-oxidant effects in its oxidized state, but there is  
35  
36 relatively little evidence that this is an important mechanism for circulating uric acid, in  
37  
38 comparison to its antioxidant role. Uric acid is well established as an important circulating  
39  
40 antioxidant and free-radical scavenger. It is an antioxidant and metal chelator in vitro.<sup>29 30</sup> It  
41  
42 can effectively clear peroxynitrite and hydroxyl radicals<sup>27 31 32</sup> and reduce oxidative stress as  
43  
44 an antioxidant, may exert possible neuroprotective effects. Moreover, it has been reported that  
45  
46 the pathogenesis of AD is related to mitochondrial dysfunction. Some studies have shown that  
47  
48 uric acid might preserve mitochondrial function and suppress oxyradical accumulation;<sup>27</sup>  
49  
50 thereby inhibiting the cytotoxic activity of lactoperoxidase<sup>33</sup> and repairing free  
51  
52 radical-induced DNA damage.<sup>34</sup> Scheepers et al. reported that lower level of serum urate may  
53  
54  
55  
56  
57  
58  
59  
60

1  
2  
3  
4 lead to a higher risk of dementia since antioxidant capacity might be reduced with the  
5  
6 decreasing of the urate concentration among middle-aged women. They surveyed and  
7  
8 followed up 1462 38 to 60 years old women over 44 years and found that a higher serum  
9  
10 urate may have a protective effect on dementia including Alzheimer's disease and vascular  
11  
12 dementia.<sup>35</sup> Euser et al. investigated that high serum urate levels are associated with a reduced  
13  
14 risk of dementia and further improved cognitive function.<sup>36</sup> In recent study, Liu et al.'s study  
15  
16 came to the same conclusion that lower level of uric acid is associated with AD in Chinese.<sup>37</sup>  
17  
18 In our study, we analyzed the AD subgroup of dementia and found that gout can reduce the  
19  
20 risk of AD. This may also confirm the neuroprotective role of uric acid. Unlike asymptomatic  
21  
22 hyperuricemia, patients with gout receive anti-inflammatory or urate-lowering therapies, and  
23  
24 it cannot be excluded that those drugs will affect the risk of dementia. Pandey et al. reported  
25  
26 that a urate-lowering drug benzbromarone can antagonize oxidative stress and improve the  
27  
28 function of vascular endothelial cells, which may be related to the reduced probability of  
29  
30 dementia in patients with gout.<sup>38</sup> However, it is not yet fully clear whether anti-gout drugs can  
31  
32 reduce the incidence of dementia and more researches will enable us to understand the effects  
33  
34 of anti-gout drugs on dementia.  
35  
36  
37  
38  
39  
40  
41  
42  
43  
44

45 Our study found no correlation between dementia and gout or hyperuricemia. Dementia  
46  
47 involves variable clinical symptoms, multiple subtypes, and complex pathogenesis, which  
48  
49 may explain the contradictory results of studies on gout or hyperuricemia. More research is  
50  
51 needed to support this viewpoint. The risk of AD is inversely proportional to gout, and the  
52  
53 neuroprotective mechanism of uric acid may play a dominant role in the pathogenesis of AD.  
54  
55  
56  
57  
58  
59  
60

1  
2  
3  
4 However, there were some potential limitations to our study. First, there were only four  
5  
6 studies in our meta-analysis, whose number of articles included were relatively small.  
7

8  
9 Moreover, the cohort studies were mostly medical registry-based studies, which would raise  
10  
11 concerns over coding inaccuracy and misclassification. Second, although studies included had  
12  
13 been adjusted for other risk factors, the statistical heterogeneity is still high, which might be  
14  
15 attributed to differences in demographics, dietary factors, environmental factors, and clinical  
16  
17 characteristics in different countries, or lack of standardized design, inclusion criteria, and  
18  
19 follow-up time. Third, this was a pooled analysis of observational studies, which could only  
20  
21 demonstrate an association, but not causality. Therefore, we cannot determine the impact of  
22  
23 gout, hyperuricemia, or other unknown confounding factors on the outcome of dementia risk.  
24  
25 Moreover, in the sensitivity analysis, we found that the results were unstable when using  
26  
27 different analysis models. Considering the high heterogeneity of the included articles, we  
28  
29 preferred the results given by the random-effects model. Consequently, caution is needed  
30  
31 when interpreting the present meta-analysis findings.  
32  
33  
34  
35  
36  
37  
38  
39

40 In conclusion, our meta-analysis of cohort studies suggested that there is no risk of dementia  
41  
42 among patients with gout and hyperuricemia. However, high uric acid levels have a protective  
43  
44 effect on AD. More investigations are needed to demonstrate the potential relationship  
45  
46 between dementia and patients with gout and hyperuricemia.  
47  
48  
49

50  
51  
52  
53 **Contributors** Conceptualization: YL Methodology: S-YP and R-JC. Formal analysis: Z-JX;  
54  
55 data curation: Q-PZ. Writing original draft preparation: S-YP and R-JC. Writing review and  
56  
57 editing: YL. Approval of final manuscript: All authors  
58  
59  
60

**Funding:** The present work was supported by the National Key Research and Development Program of China (Project no.2016YFC0906201) to YL, 1.3.5 project for disciplines of excellence, West China Hospital, Sichuan University (Project no. ZYGD18015) to YL.

**Competing interests** None declared.

**Patient and public involvement** No patient involved.

**Provenance and peer review** Not commissioned; externally peer reviewed.

**Data sharing statement** No additional data are available.

## REFERENCES

1. Gale SA, Acar D, Daffner KR. Dementia. *Am J Med* 2018;131:1161-69.
2. Prince M, Bryce R, Albanese E, *et al*. The global prevalence of dementia: a systematic review and metaanalysis. *Alzheimers Dement* 2013;9:63-75.e2.
3. Li L, Zhang Y, Zeng C. Update on the epidemiology, genetics, and therapeutic options of hyperuricemia. *Am J Transl Res* 2020;12:3167-81.
4. Gupta MK, Singh JA. Cardiovascular disease in gout and the protective effect of treatments including urate-lowering therapy. *Drugs* 2019;79:531-41.
5. Mollenhauer B, Zimmermann J, Sixel-Doring F, *et al*. Baseline predictors for progression 4 years after Parkinson's disease diagnosis in the De Novo Parkinson Cohort (DeNoPa). *Mov Disord* 2019;34:67-77.
6. Lai SW, Lin CL, Liao KF. No association between gout and Alzheimer's disease: Results of a case-control study in older people in Taiwan. *Int J Geriatr Psych* 2013;28:1205-06.
7. Engel B, Gomm W, Broich K, *et al*. Hyperuricemia and dementia—A case-control study. *BMC Neurol* 2018;18:131.
8. Lu N, Dubreuil M, Zhang Y, *et al*. Gout and the risk of Alzheimer's disease: A population-based, BMI-matched cohort study. *Ann Rheum Dis*. 2016;75:547-51.
9. Latourte A, Soumare A, Bardin T, *et al*. Uric acid and incident dementia over 12 years of follow-up: a population-based cohort study. *Ann Rheum Dis* 2018;77:328-35.
10. Hong JY, Lan TY, Tang GJ, *et al*. Gout and the risk of dementia: A nationwide population-based cohort study. *Arthritis Res Ther* 2015;17:139.
11. Schretlen DJ, Inscore AB, Jinnah HA, *et al*. Serum uric acid and cognitive function in community-dwelling older adults. *Neuropsychology* 2007;21:136-40.
12. Higgins JP, Thompson SG. Quantifying heterogeneity in a meta-analysis. *Stat Med* 2002;21:1539-58.
13. Higgins JP, Thompson SG, Deeks JJ, *et al*. Measuring inconsistency in meta-analyses. *BMJ* 2003;327:557-60.
14. Singh JA, Cleveland JD. Gout and dementia in the elderly: a cohort study of Medicare claims. *BMC Geriatr* 2018;18:281.
15. Wallin K, Solomon A, Kareholt I, *et al*. Midlife rheumatoid arthritis increases the risk of cognitive



- impairment two decades later: a population-based study. *J Alzheimer Dis* 2012;31:669-76.
16. Dregan A, Chowienczyk P, Gulliford MC. Are inflammation and related therapy associated with all-cause dementia in a primary care population? *J Alzheimer Dis* 2015;46:1039-47.
17. Cabau G, Crisan TO, Kluck V, *et al.* Urate-induced immune programming: Consequences for gouty arthritis and hyperuricemia. *Immunol Rev* 2020;294:92-105.
18. Campbell IL, Stalder AK, Chiang CS, *et al.* Transgenic models to assess the pathogenic actions of cytokines in the central nervous system. *Mol Psych* 1997;2:125-9.
19. Rafnsson SB, Deary IJ, Smith FB, *et al.* Cognitive decline and markers of inflammation and hemostasis: the Edinburgh Artery Study. *J Am Geriatr Soc* 2007;55:700-7.
20. Schram MT, Euser SM, de Craen AJ, *et al.* Systemic markers of inflammation and cognitive decline in old age. *J Am Geriatr Soc* 2007;55:708-16.
21. Pratico D, Uryu K, Leight S, *et al.* Increased lipid peroxidation precedes amyloid plaque formation in an animal model of Alzheimer amyloidosis. *J Neurosci* 2001;21:4183-7.
22. Lin MT, Beal MF. Mitochondrial dysfunction and oxidative stress in neurodegenerative diseases. *Nature* 2006;443:787-95.
23. Libby P. Inflammation in atherosclerosis. *Nature* 2002;420:868-74.
24. Dufouil C, Seshadri S, Chene G. Cardiovascular risk profile in women and dementia. *J Alzheimer Dis* 2014;42 Suppl 4:S353-63.
25. Coyle JT, Puttfarcken P. Oxidative stress, glutamate, and neurodegenerative disorders. *Science* 1993;262:689-95.
26. Kanellis J, Kang DH. Uric acid as a mediator of endothelial dysfunction, inflammation, and vascular disease. *Semin Nephrol* 2005;25:39-42.
27. Yu ZF, Bruce-Keller AJ, Goodman Y, *et al.* Uric acid protects neurons against excitotoxic and metabolic insults in cell culture, and against focal ischemic brain injury in vivo. *J Neurosci Research* 1998;53:613-25.
28. Squadrito GL, Cueto R, Splenser AE, *et al.* Reaction of uric acid with peroxynitrite and implications for the mechanism of neuroprotection by uric acid. *Arch Biochem Biophys* 2000;376:333-7.
29. Ames BN, Cathcart R, Schwiers E, *et al.* Uric acid provides an antioxidant defense in humans against oxidant- and radical-caused aging and cancer: S hypothesis. *Proc Natl Acad Sci U S A* 1981;78:6858-62.
30. Davies KJ, Sevanian A, Muakkassah-Kelly SF, *et al.* Uric acid-iron ion complexes. A new aspect of the antioxidant functions of uric acid. *Biochem J* 1986;235:747-54.
31. Hooper DC, Spitsin S, Kean RB, *et al.* Uric acid, a natural scavenger of peroxynitrite, in experimental allergic encephalomyelitis and multiple sclerosis. *Proc Natl Acad Sci U S A* 1998;95:675-80.
32. Waring WS, Webb DJ, Maxwell SR. Systemic uric acid administration increases serum antioxidant capacity in healthy volunteers. *J Cardiovasc Pharmacol* 2001;38:365-71.
33. Everse J, Coates PW. The cytotoxic activity of lactoperoxidase: enhancement and inhibition by neuroactive compounds. *Free Radic Biol Med* 2004;37:839-49.
34. Anderson RF, Harris TA. Dopamine and uric acid act as antioxidants in the repair of DNA radicals: implications in Parkinson's disease. *Free radical Res* 2003;37:1131-6.
35. Scheepers LEJM, Jacobsson LTH, Kern S, *et al.* Urate and risk of Alzheimer's disease and vascular dementia: A population-based study. *Alzheimer's and Dementia* 2019;15(6):754-63.
36. Euser SM, Hofman A, Westendorp RGJ, *et al.* Serum uric acid and cognitive function and dementia.

1  
2  
3 *Brain : a journal of neurology* 2009;132(2):377-82.

- 4 37. Liu H, Reynolds G, Wei X. Uric Acid and High-Density Lipoprotein Cholesterol Are Differently  
5 Associated with Alzheimer's Disease and Vascular Dementia. *Journal of Alzheimer's disease :*  
6 *JAD* 2020;73(3):1125-31.  
7  
8 38. Pandey R, Wang T, Tadjidje E, et al. Structure-activity relationships of benzbromarone  
9 metabolites and derivatives as EYA inhibitory anti-angiogenic agents. *PloS one*  
10 2013;8(12):e84582.  
11  
12  
13  
14  
15  
16  
17  
18  
19  
20  
21  
22  
23  
24  
25  
26  
27  
28  
29  
30  
31  
32  
33  
34  
35  
36  
37  
38  
39  
40  
41  
42  
43  
44  
45  
46  
47  
48  
49  
50  
51  
52  
53  
54  
55  
56  
57  
58  
59  
60

For peer review only

**Table 1** Characteristics of included studies in the meta-analysis.

|                                    | Lu N et al. [8]                                                                                                                    | Singh JA et al. [14]                                                                         | Hong JY et al. [10]                           | Latourte A et al. [9]                                                                                          |
|------------------------------------|------------------------------------------------------------------------------------------------------------------------------------|----------------------------------------------------------------------------------------------|-----------------------------------------------|----------------------------------------------------------------------------------------------------------------|
| Country                            | UK                                                                                                                                 | USA                                                                                          | Taiwan, China                                 | France                                                                                                         |
| Study design                       | Cohort study                                                                                                                       | Cohort study                                                                                 | Cohort study                                  | Cohort study                                                                                                   |
| Year                               | 2016                                                                                                                               | 2018                                                                                         | 2015                                          | 2018                                                                                                           |
| Age, mean years                    | 65                                                                                                                                 | 75.2                                                                                         | 63.5                                          | 72.9                                                                                                           |
| Male, %                            | 71                                                                                                                                 | 42.6                                                                                         | 63                                            | 38.7                                                                                                           |
| Diagnosis of gout or Hyperuricemia | diagnostic code using the Read classification                                                                                      | (ICD-9-CM) codes                                                                             | (ICD9-CM) codes                               | Hyperuricemia: $\geq 360$ $\mu\text{mol} / \text{L}$ for men, $\geq 300$ $\mu\text{mol} / \text{L}$ for women. |
| Diagnosis of dementia              | AD diagnostic codes                                                                                                                | (ICD-9-CM) codes                                                                             | (ICD9-CM) codes                               | DSM-IV<br>NINCDS-ADRDA                                                                                         |
| Subtype of dementia                | AD                                                                                                                                 | All subtypes of dementia                                                                     | All subtypes of dementia<br>AD, VD            | All subtypes of dementia<br>AD                                                                                 |
| Number of dementia with controls   | 309/238805                                                                                                                         | 106346/1416173                                                                               | 5905/114742<br>AD:102/114742<br>VD:210/114742 | 78/1192<br>AD:55/1192                                                                                          |
| Number of dementia with cases      | 1942/59224                                                                                                                         | 5310/296648                                                                                  | 1214/28769<br>AD:542/28769<br>VD:991/28769    | 32/406<br>AD:21/406                                                                                            |
| Adjusted confounders               | Age, gender, entry-time, BMI, smoking, alcohol use, physician visits, social deprivation index, comorbidities, and medication use. | Age, gender, race, medical comorbidities, common medications for cardiac diseases, and gout. | Age, gender, relevant comorbidities.          | Age, gender, tobacco and alcohol consumption, cholesterol, medical comorbidities, medication use               |

|                                            |          |           |          |          |
|--------------------------------------------|----------|-----------|----------|----------|
| Follow-up years<br>(mean or mean $\pm$ SD) | 5        | 2.3 (1.7) | 4.3(2.1) | 12       |
| Quality grading                            | 7 points | 6 points  | 7 points | 8 points |

(AD: Alzheimer's disease; VD: Vascular dementia; DSM-IV: Diagnostic and Statistical Manual of Mental disorders Version IV; NINCDS-ADRDA: the National Institute of Neurological and Communicative Disorders and Stroke–Alzheimer's Disease and Related Disorders Association; ICD9-CM: International Classification of Diseases Ninth Revision, Clinical Modification codes; BMI: body mass index)

1  
2  
3  
4  
5  
6  
7  
8  
9  
10  
11  
12  
13  
14  
15  
16  
17  
18  
19  
20  
21  
22  
23  
24  
25  
26  
27  
28  
29  
30  
31  
32  
33  
34  
35  
36  
37  
38  
39  
40  
41  
42  
43  
44  
45  
46  
47  
48  
49  
50  
51  
52  
53  
54  
55  
56  
57  
58  
59  
60

Figure 1 Flow diagram showing the identification and selection of cohort studies included in the review.

Figure 2 Forest plot showing an association between dementia and patient's with gout and hyperuricemia.

Figure 3 Forest plot showing an association between AD and patient's with gout and hyperuricemia.

For peer review only

Figure 1 Flow diagram showing the identification and selection of cohort studies included in the review.

Figure 1

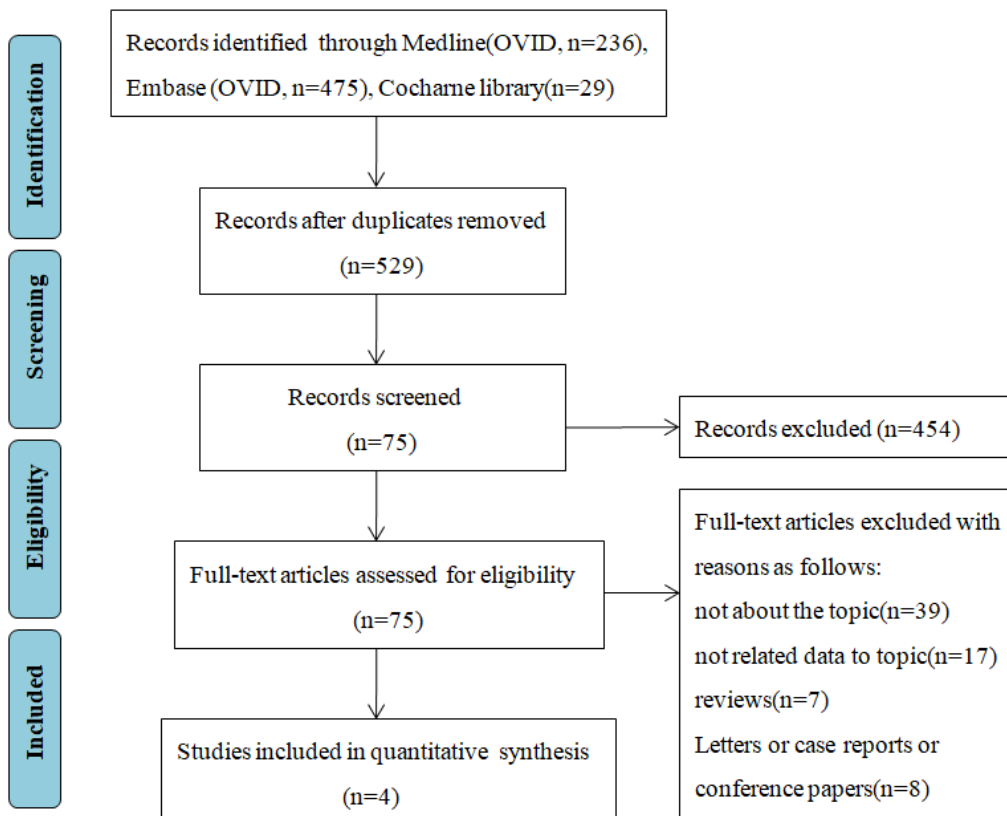

Figure 2 Forest plot showing an association between dementia and patient's with gout and hyperuricemia.

Figure 2

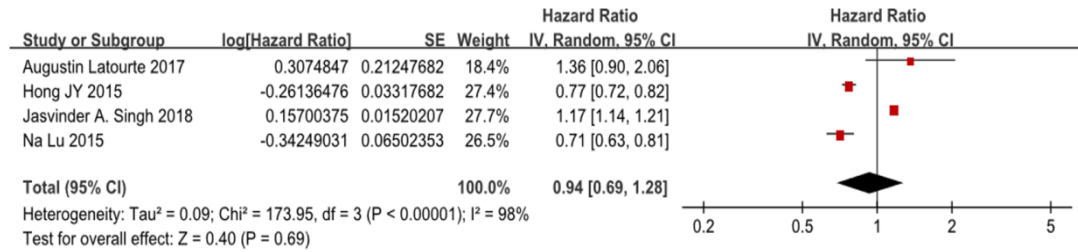

Figure 3 Forest plot showing an association between AD and patient's with gout and hyperuricemia.

Figure 3

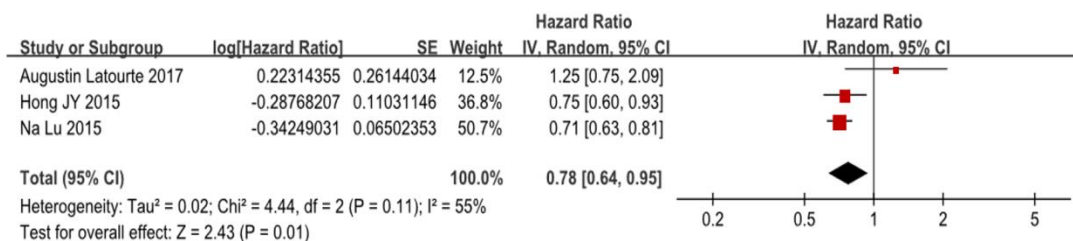



1  
2  
3  
4 Appendix 1  
5

6 Medline Ovid Search Strategy  
7

- 8  
9 1. exp Dementia/  
10  
11 2. Delirium/  
12  
13 3. Wernicke Encephalopathy/  
14  
15 4. Delirium, Dementia, Amnestic, Cogni-tive Disorders/  
16  
17 5. dement\*.mp.  
18  
19 6. alzheimer\*.mp.  
20  
21 7. (lewy\* adj2 bod\*).mp.  
22  
23 8. deliri\*.mp.  
24  
25 9. (chronic adj2 cerebrovascular).mp.  
26  
27 10. (organic brain disease or organicbrain syndrome).mp  
28  
29 11. (normal pressure hydrocephalus andshunt\*).mp.  
30  
31 12. benign senescent forgetfulness.mp.  
32  
33 13. (cerebr\* adj2 deteriorat\*).mp.  
34  
35 14. (cerebral\* adj2 insufficient\*).mp.  
36  
37 15. (pick\* adj2 disease).mp.  
38  
39 16. (creutzfeldt or jcd or cjd).mp.  
40  
41 17. huntington\*.mp.  
42  
43 18. binswanger\*.mp.  
44  
45 19. korsako\*.mp.  
46  
47  
48  
49  
50  
51  
52  
53  
54  
55  
56  
57  
58 20.1-19/OR  
59  
60

1  
2  
3  
4 21.exp gout/  
5

6 22.gout.mp.  
7

8  
9 23. exp hyperuricemia /  
10

11 24. uric acid.mp.  
12

13  
14 25.20-23/OR  
15

16  
17 26. 20 and 25  
18  
19

20  
21  
22 Appendix 2  
23

24 Embase search strategy  
25

26  
27 1.exp gout/  
28

29  
30 2.gout.mp.  
31

32  
33 3. exp hyperuricemia /  
34

35 4. uric acid.mp.  
36

37  
38 5.1-4/OR  
39

40 6. exp \*dementia/  
41

42  
43 7. dement\*.ti,ab.  
44

45 8. alzheimer\*.ti,ab.  
46

47  
48 9. (lewy\* adj2 bod\*).ti,ab.  
49

50  
51 10. (frontotemporal\* or FTD or FTLD).ti,ab.  
52

53 11.6-10/or  
54

55  
56 12. 5 and 11  
57  
58  
59  
60

1  
2  
3  
4 Appendix 3  
5

6 Cochrane librarysearch strategy  
7

8  
9 1.exp gout/  
10

11  
12 2.gout.mp.  
13

14 3. exp hyperuricemia /  
15

16  
17 4. uric acid.mp.  
18

19  
20 5.1-4/OR  
21

22 6. exp \*dementia/  
23

24  
25 7. dement\*.ti,ab.  
26

27  
28 8. alzheimer\*.ti,ab.  
29

30  
31 9. (lewy\* adj2 bod\*).ti,ab.  
32

33  
34 10. (frontotemporal\* or FTD or FTLD).ti,ab.  
35

36  
37 11.6-10/or  
38

39  
40  
41  
42  
43  
44  
45  
46  
47  
48  
49  
50  
51  
52  
53  
54  
55  
56  
57  
58  
59  
60  
12. 5 and 11



# PRISMA 2009 Checklist

| Section/topic                      | #  | Checklist item                                                                                                                                                                                                                                                                                              | Reported on page # |
|------------------------------------|----|-------------------------------------------------------------------------------------------------------------------------------------------------------------------------------------------------------------------------------------------------------------------------------------------------------------|--------------------|
| <b>TITLE</b>                       |    |                                                                                                                                                                                                                                                                                                             |                    |
| Title                              | 1  | Identify the report as a systematic review, meta-analysis, or both.                                                                                                                                                                                                                                         | P1                 |
| <b>ABSTRACT</b>                    |    |                                                                                                                                                                                                                                                                                                             |                    |
| Structured summary                 | 2  | Provide a structured summary including, as applicable: background; objectives; data sources; study eligibility criteria, participants, and interventions; study appraisal and synthesis methods; results; limitations; conclusions and implications of key findings; systematic review registration number. | P1-2               |
| <b>INTRODUCTION</b>                |    |                                                                                                                                                                                                                                                                                                             |                    |
| Rationale                          | 3  | Describe the rationale for the review in the context of what is already known.                                                                                                                                                                                                                              | P3                 |
| Objectives                         | 4  | Provide an explicit statement of questions being addressed with reference to participants, interventions, comparisons, outcomes, and study design (PICOS).                                                                                                                                                  | P3                 |
| <b>METHODS</b>                     |    |                                                                                                                                                                                                                                                                                                             |                    |
| Protocol and registration          | 5  | Indicate if a review protocol exists, if and where it can be accessed (e.g., Web address), and, if available, provide registration information including registration number.                                                                                                                               | none               |
| Eligibility criteria               | 6  | Specify study characteristics (e.g., PICOS, length of follow-up) and report characteristics (e.g., years considered, language, publication status) used as criteria for eligibility, giving rationale.                                                                                                      | P4-5               |
| Information sources                | 7  | Describe all information sources (e.g., databases with dates of coverage, contact with study authors to identify additional studies) in the search and date last searched.                                                                                                                                  | P4                 |
| Search                             | 8  | Present full electronic search strategy for at least one database, including any limits used, such that it could be repeated.                                                                                                                                                                               | P4                 |
| Study selection                    | 9  | State the process for selecting studies (i.e., screening, eligibility, included in systematic review, and, if applicable, included in the meta-analysis).                                                                                                                                                   | P4                 |
| Data collection process            | 10 | Describe method of data extraction from reports (e.g., piloted forms, independently, in duplicate) and any processes for obtaining and confirming data from investigators.                                                                                                                                  | P4                 |
| Data items                         | 11 | List and define all variables for which data were sought (e.g., PICOS, funding sources) and any assumptions and simplifications made.                                                                                                                                                                       | P4                 |
| Risk of bias in individual studies | 12 | Describe methods used for assessing risk of bias of individual studies (including specification of whether this was done at the study or outcome level), and how this information is to be used in any data synthesis.                                                                                      | P4                 |
| Summary measures                   | 13 | State the principal summary measures (e.g., risk ratio, difference in means).                                                                                                                                                                                                                               | P4                 |
| Synthesis of results               | 14 | Describe the methods of handling data and combining results of studies, if done, including measures of consistency (e.g., I <sup>2</sup> ) for each meta-analysis.                                                                                                                                          | P5                 |

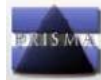

# PRISMA 2009 Checklist

Page 1 of 2

| Section/topic                 | #  | Checklist item                                                                                                                                                                                           | Reported on page # |
|-------------------------------|----|----------------------------------------------------------------------------------------------------------------------------------------------------------------------------------------------------------|--------------------|
| Risk of bias across studies   | 15 | Specify any assessment of risk of bias that may affect the cumulative evidence (e.g., publication bias, selective reporting within studies).                                                             | P5                 |
| Additional analyses           | 16 | Describe methods of additional analyses (e.g., sensitivity or subgroup analyses, meta-regression), if done, indicating which were pre-specified.                                                         | none               |
| <b>RESULTS</b>                |    |                                                                                                                                                                                                          |                    |
| Study selection               | 17 | Give numbers of studies screened, assessed for eligibility, and included in the review, with reasons for exclusions at each stage, ideally with a flow diagram.                                          | P6                 |
| Study characteristics         | 18 | For each study, present characteristics for which data were extracted (e.g., study size, PICOS, follow-up period) and provide the citations.                                                             | P6                 |
| Risk of bias within studies   | 19 | Present data on risk of bias of each study and, if available, any outcome level assessment (see item 12).                                                                                                | P6                 |
| Results of individual studies | 20 | For all outcomes considered (benefits or harms), present, for each study: (a) simple summary data for each intervention group (b) effect estimates and confidence intervals, ideally with a forest plot. | P6                 |
| Synthesis of results          | 21 | Present results of each meta-analysis done, including confidence intervals and measures of consistency.                                                                                                  | P6-7               |
| Risk of bias across studies   | 22 | Present results of any assessment of risk of bias across studies (see Item 15).                                                                                                                          | P6-7               |
| Additional analysis           | 23 | Give results of additional analyses, if done (e.g., sensitivity or subgroup analyses, meta-regression [see Item 16]).                                                                                    | none               |
| <b>DISCUSSION</b>             |    |                                                                                                                                                                                                          |                    |
| Summary of evidence           | 24 | Summarize the main findings including the strength of evidence for each main outcome; consider their relevance to key groups (e.g., healthcare providers, users, and policy makers).                     | P7-9               |
| Limitations                   | 25 | Discuss limitations at study and outcome level (e.g., risk of bias), and at review-level (e.g., incomplete retrieval of identified research, reporting bias).                                            | P9-10              |
| Conclusions                   | 26 | Provide a general interpretation of the results in the context of other evidence, and implications for future research.                                                                                  | P10                |
| <b>FUNDING</b>                |    |                                                                                                                                                                                                          |                    |
| Funding                       | 27 | Describe sources of funding for the systematic review and other support (e.g., supply of data); role of funders for the systematic review.                                                               | P10                |

From: Moher D, Liberati A, Tetzlaff J, Altman DG, The PRISMA Group (2009). Preferred Reporting Items for Systematic Reviews and Meta-Analyses: The PRISMA Statement. PLoS Med 6(6): e1000097. doi:10.1371/journal.pmed1000097

For more information, visit: [www.prisma-statement.org](http://www.prisma-statement.org).

Page 2 of 2

For peer review only - <http://bmjopen.bmj.com/site/about/guidelines.xhtml>
