# Supplementary material for: Risk of dementia in gout and hyperuricaemia: a meta-analysis of cohort studies
Source: PubMed Central journal article supplement — BMJ Open. 2021 Jun 22;11(6):e041680. doi: 10.1136/bmjopen-2020-041680 (PMC8220455; doi:10.1136/bmjopen-2020-041680), 2021-06-22
Supplement: bmjopen-2020-041680supp001.pdf [file bmjopen-2020-041680supp001.pdf]

## Appendix 1

### Medline Ovid Search Strategy

1. exp Dementia/
2. Delirium/
3. Wernicke Encephalopathy/
4. Delirium, Dementia, Amnesic, Cogni-tive Disorders/
5. dement\*.mp.
6. alzheimer\*.mp.
7. (lewy\* adj2 bod\*).mp.
8. deliri\*.mp.
9. (chronic adj2 cerebrovascular).mp.
10. (organic brain disease or organicbrain syndrome).mp
11. (normal pressure hydrocephalus andshunt\*).mp.
12. benign senescent forgetfulness.mp.
13. (cerebr\* adj2 deteriorat\*).mp.
14. (cerebral\* adj2 insufficient\*).mp.
15. (pick\* adj2 disease).mp.
16. (creutzfeldt or jcd or cjd).mp.
17. huntington\*.mp.
18. binswanger\*.mp.
19. korsako\*.mp.
- 20.1-19/OR

21.exp gout/

22.gout.mp.

23. exp hyperuricemia /

24. uric acid.mp.

25.20-23/OR

26. 20 and 25

## Appendix 2

Embase search strategy

1.exp gout/

2.gout.mp.

3. exp hyperuricemia /

4. uric acid.mp.

5.1-4/OR

6. exp \*dementia/

7. dement\*.ti,ab.

8. alzheimer\*.ti,ab.

9. (lewy\* adj2 bod\*).ti,ab.

10. (frontotemporal\* or FTD or FTLD).ti,ab.

11.6-10/or

12. 5 and 11

### Appendix 3

Cochrane librarysearch strategy

1.exp gout/

2.gout.mp.

3. exp hyperuricemia /

4. uric acid.mp.

5.1-4/OR

6. exp \*dementia/

7. dement\*.ti,ab.

8. alzheimer\*.ti,ab.

9. (lewy\* adj2 bod\*).ti,ab.

10. (frontotemporal\* or FTD or FTLD).ti,ab.

11.6-10/or

12. 5 and 11
